# Supplementary material
Source: PubMed Central journal article supplement (PMC4308742)
Supplement: ja510711x_si_001.pdf [file ja510711x_si_001.pdf]

# Supporting Information

## **Biosynthesis of versipelostatin: Identification of an enzyme-catalyzed [4+2]-cycloaddition required for macrocyclization of spirotetronate-containing polyketides**

Takuya Hashimoto<sup>1</sup>, Junko Hashimoto<sup>2</sup>, Kuniko Teruya<sup>3</sup>, Takashi Hirano<sup>3</sup>, Kazuo Shin-ya<sup>4</sup>, Haruo Ikeda<sup>5</sup>, Hung-wen Liu<sup>6</sup>, Makoto Nishiyama<sup>1</sup>, Tomohisa Kuzuyama<sup>1\*</sup>

<sup>1</sup>Biotechnology Research Center, The University of Tokyo, 1-1-1 Yayoi, Bunkyo-ku, Tokyo 113-8657, <sup>2</sup>Japan Biological Informatics Consortium, 2-4-7 Aomi, Koto-ku, Tokyo 135-0064, <sup>3</sup>Okinawa Institute of Advanced Sciences, Okinawa Life Science Research Center 120, 5-8 Suzaki, Uruma, Okinawa 904-2234, <sup>4</sup>National Institute of Advanced Industrial Science and Technology, 2-4-7 Aomi, Koto-ku, Tokyo 135-0064, <sup>5</sup>Kitasato Institute for Life Sciences, Kitasato University, 1-15-1 Kitasato, Minami-ku, Sagamihara, Kanagawa 252-0373, Japan, <sup>6</sup>Division of Medicinal Chemistry, College of Pharmacy, and Department of Chemistry, University of Texas at Austin, Austin, Texas 78712, United States.

## Experimental Section

### General

Oligonucleotides for the polymerase chain reaction (PCR) were purchased from Operon Biotechnologies (Tokyo, Japan). Draft genome sequencing was carried out using the Genome Analyzer IIx system (Illumina San Diego, CA).

Pulse field gel electrophoresis was performed with the CHEF Mapper<sup>®</sup> XA System from Bio-rad. HR-ESI-MS (negative mode) was measured using an ABSCIEX Triple TOF 5600 system equipped with a UFLC Nexera system (Shimadzu, Kyoto, Japan). NMR spectra were recorded on a JEOL ECA-600 spectrometer (JEOL, Tokyo, Japan) operating at 600 MHz for <sup>1</sup>H, 150 MHz for <sup>13</sup>C nuclei. Cells were disrupted using a Branson Sonifier 250 (Emerson Japan, Tokyo, Japan). DNA manipulation was performed according to standard protocols.

### Construction of BAC library and screening of BAC clones containing *vst* biosynthetic gene cluster

The construction of the BAC library of *S. versipellis* 4083-SVS6 was performed following a previously reported protocol.<sup>1</sup> *S. versipellis* 4083-SVS6 cells cultured in TSB medium containing 0.5% glycine for 2 days were embedded in 0.5% InCert<sup>®</sup> agarose (Lonza, ME, USA) before digestion with 1 mg/mL lysozyme (30 °C overnight). The resulting protoplasts were lysed by the addition of 1% sodium N-lauroylsarcosinate and 1 mg ml<sup>-1</sup> proteinase K at 50 °C for 24 h. The supernatant was removed and proteinase K was inactivated by 0.1 mM 4-(2-aminoethyl) benzenesulfonyl fluoride hydrochloride. After removal of the detergent by repeated washing with 50 mM EDTA (pH 8.0), DNA embedded in the agarose plug was partially digested by *Bam*HI and separated with CHEF electrophoresis. DNA of around 150 kb length was cut out from the gel and purified using agarose gel. Agarose gel containing DNA fragments was melted by NaI at half the gel weight. Melted agarose and NaI were removed by dialysis (0.025 μm pore size filter) against TE buffer. The residual agarose was completely digested by DNase-free agarase. Purified DNA fragments were ligated with a large *Bam*HI segment of the BAC vector pKU503D.<sup>2</sup> Then, *E. coli* NEB 10-beta was transformed by electroporation with ligated DNA. The desired clone was screened with PCR using two sets of primers *vst*-up-F and *vst*-up-R, and *vst*-down-F and *vst*-down-R designed to amplify upstream and downstream of the gene cluster. The BAC clone pKU503DverP10N24 was purified with the QIAGEN Large-Construct Kit (QIAGEN) according to the manufacturer's protocol. Complete DNA sequence of pKU503DverP10N24 was obtained by PacBio sequencing (accession number: LC006086)

### Inactivation of *vstJ* gene in *S. albus* J1074:: pKU503DverP10N24

For the construction of the *vstJ* (429 bp) disruption plasmid, a 2.0 kb DNA fragment containing the region upstream of *vstJ* and a 2.0 kb DNA fragment containing the region downstream of *vstJ* were

amplified with *vstJ-del-pre\_F* and *vstJ-del-pre\_R*, and with *vstJ-del-post\_F* and *vstJ-del-post\_R*, respectively. Each of the fragments was cloned into pT7blue vector to give pT7vstJpre and pT7vstJpost confirmed by DNA sequence. Each of the plasmids was digested with *Hind*III and *Xba*I and both fragments were simultaneously cloned into the *Hind*III site of pUC118apr<sup>3</sup> to give pUC118aprΔvstJ.

*S. albus* J1074::pKU503DverP10N24 was transformed with pUC118aprΔvstJ. Desired transformants were then selected on R2YE plates containing apramycin at a concentration of 25 μg ml<sup>-1</sup>. The obtained transformant was cultured in R2YE medium for 2 days. Protoplasts were prepared from the transformant culture and regenerated on R2YE plates. Each of the regenerated colonies was inoculated on TSB plates with or without apramycin respectively, and an apramycin-sensitive colony was selected to obtain the *vstJ* knockout mutant, *S. albus* J1074::pKU503DverP10N24ΔvstJ. Successful deletion was confirmed by PCR amplification of the *vstJ* gene using *vstJ-F* and *vstJ-R*. (Fig. S9).

### **Bacterial culture**

*S. versipellis* 4083-SVS6, *S. albus* J1074::pKU503DverP10N24, *S. albus* J1074::pKU503DverP10N24ΔvstJ and *S. albus* J1074::pKU503D (negative control) were cultivated in K medium (2.5% soluble starch, 1.5% soybean meal, dry 0.2% yeast, and 0.4% calcium carbonate, and the pH was adjusted to 6.2). After cultivation, an equivalent volume of acetone was added to the culture broth. After the extraction, the mixture was filtered with filter paper, and then the acetone was removed by evaporation and the remaining aqueous layer was extracted with ethyl acetate.

### **LC/MS analytical condition**

For HPLC-UV/VIS-MS analysis, 10 % MeOH containing 10 mM ammonium formate (pH3.0) and 90 % MeOH containing 10 mM ammonium formate (pH3.0) were used as eluent A and B, respectively. HPLC-UV/VIS-MS analysis was performed with a C-18 column (CAPCEL PAK C<sub>18</sub> IF 2.0 × 50 mm, Shiseido) under the following conditions: a gradient from 0 to 100 % eluent B for 6.0 min, 100 % B 6.0 min to 8.0 min, and 0 % B 8.0 to 15 min.

### **Preparation of the intermediate (3)**

*S. albus* J1074::pKU503DverP10N24ΔvstJ was inoculated into PC-1 media (1.0 % Starch, 1.0 % meat extract, 1.0 % polypeptone, 1.0 % molasses, pH 7.2) including neomycin (25 μg ml<sup>-1</sup>) for 2 days, at 30 °C. Two ml of preculture was inoculated in K medium (4 L) including neomycin (25 μg ml<sup>-1</sup>) for 3 days, at 27 °C on a rotary shaker at 180 rpm. Cell and broth were separated by centrifugation. Cell was extracted with acetone, and then filtered with filter paper. Acetone was removed by evaporation and the remaining aqueous layer was extracted with ethyl acetate. The ethyl acetate layer was dried by evaporation to give 480 mg of residue. The extracted residue was applied on a preparative thin layer

chromatography plate (PLC Silica gel F254, Merck, Tokyo) which was developed with ethyl acetate and hexane (v/v 3:1). The crude sample (52 mg) was then subjected to preparative HPLC using a PEGASIL ODS column (Senshu-Pak, 20 × 250 mm, Senshu, Tokyo) developed using 87.5% MeOH containing 10 mM ammonium formate (pH 3.0). Finally, **3** (12.2 mg) was obtained as a yellow oil. HR·ESI-MS:  $m/z$  677.4410 [M-H]<sup>-</sup>; calculated for [M (C<sub>42</sub>H<sub>62</sub>O<sub>7</sub>)-H]<sup>-</sup>, 677.4417.

### Preparation of recombinant VstJ protein

The vstJ-F and vstJ-R primers were used to amplify the *vstJ* gene from the *S. versipellis* 4083 SVS6 genome by PCR. The PCR-amplified 0.4-kb DNA fragment was cloned into the pT7Blue T-vector to construct pT7-vstJ. The sequence of pT7-vstJ was confirmed by DNA sequencing. pT7-vstJ digested with *Nco*I and *Bam*HI, and cloned into the same sites of pHis8<sup>4</sup> to give pHis8-vstJ. The pHis8-vstJ construct was then used to transform *E. coli* BL21 (DE3).

*E. coli* BL21 (DE3) harboring pHis8-vstJ was pre-cultured in Luria-Bertani (LB) medium containing 50 µg ml<sup>-1</sup> kanamycin at 37 °C. The pre-culture was inoculated into Terrific Broth containing kanamycin at a concentration of 50 µg ml<sup>-1</sup> and grown at 37 °C for 2 h. The broth was cooled on ice for 10 min, made 0.1 mM in isopropyl β-thiogalactopyranoside, and cultured for an additional 20 h at 18 °C. The cells were harvested by centrifugation at 3,910 × *g* at 4 °C for 10 min.

For protein extraction, cells were suspended in a buffer containing 50 mM Tris-HCl, pH 8.0, 20 mM imidazole, and 150 mM NaCl. The cell suspension was homogenized by sonication. The lysate was centrifuged at 34,700 × *g* at 4 °C for 20 min. VstJ was purified from the resulting supernatant using Ni-NTA Superflow resin (Qiagen, Tokyo, Japan). After washing with buffer containing 50 mM Tris-HCl, pH 8.0, 20 mM imidazole, and 150 mM NaCl, VstJ was eluted using the same buffer containing 250 mM imidazole. The resultant protein solution was dialyzed against 50 mM Tris-HCl, pH 8.0 and 150 mM NaCl overnight. Protein solution was concentrated to appropriate concentration with Vivaspin 10,000 MWCO (Millipore).

### VstJ assay

The standard VstJ assay was performed at 30 °C in 500 µl reaction mixture containing 50 mM Tris-HCl pH 8.0, 0.5 mM of **3**, and 1 mg ml<sup>-1</sup> VstJ. At the indicated times (1, 2, 3, 5, and 60 min), a 50 µl aliquot of the reaction mixture was removed and quenched by mixing with 50 µl of methanol. After centrifugation, the supernatant was subjected to HPLC-UV/VIS-MS analysis.

To investigate pH dependence, the VstJ assay was performed at 30 °C for 30 min in 100 µl reaction mixture containing 0.5 mM of **2**, 1 mg ml<sup>-1</sup> VstJ and 50 mM HEPES-NaOH pH 6.7, 7.0, 7.5, or 50 mM Tris-HCl pH 7.5, 8.0, 8.5, 9.0 respectively. The reaction was quenched by the addition of an equal volume of MeOH and the supernatant was subjected to HPLC-UV/VIS-MS analysis.

For determination of the kinetic parameters, the VstJ assay was performed in 0.8 ml reaction mixture containing 50 mM Tris-HCl (pH 8.0), 10 µg ml<sup>-1</sup> VstJ in the presence of **3**. The concentration of **3** was varied from 5 µM to 60 µM. The enzyme-dependent decrease of **3** was monitored using a

UV-1600PC spectrophotometer (Shimadzu, Kyoto, Japan) equipped with a CPS-240A cell holder (Shimadzu) that was adjusted to 30 °C. The initial velocities were determined from the slope of a plot of the decrease of **3** as a function of the incubation time. The molar extinction coefficient ( $\epsilon$ ) of **3** was 4700 M<sup>-1</sup> cm<sup>-1</sup> at 308 nm. The steady-state kinetic parameters were calculated using SigmaPlot 12.3 software (Systat Software, Point Richmond, CA).

#### **Preparation of compound 4**

Standard VstJ assay was performed at 30 °C in 100 ml volume. After overnight reaction, the reaction mixture was extracted with ethyl acetate. Ethyl acetate was removed by evaporation. Then, the residue was subjected to preparative HPLC using a PEGASIL ODS column (Senshu-Pak, 20 × 250 mm, Senshu, Tokyo) developed with 90% MeOH containing 0.1% formic acid. A total of 1.0 mg of **4** (white powder) was obtained. HR-ESI-MS:  $m/z$  677.4420 [M-H]<sup>-</sup>; calculated for [M (C<sub>42</sub>H<sub>62</sub>O<sub>7</sub>)-H]<sup>-</sup>, 677.4417.

**Table S1.** Strains and vectors used in this study.

| <b>Vectors/Plasmids</b>                               | <b>Characteristic(s)</b>                                                      | <b>Source/Reference</b> |
|-------------------------------------------------------|-------------------------------------------------------------------------------|-------------------------|
| pKU503D                                               | BAC vector                                                                    | 2                       |
| pKU503DverP10N24                                      | BAC clone including the <i>vst</i> gene cluster                               | This study              |
| pUC118apr                                             | Vector for gene inactivation                                                  | 3                       |
| pUC118apr $\Delta$ vstJ                               | Plasmid for the <i>vstJ</i> gene inactivation                                 | This study              |
| pHis8-vstJ                                            | Plasmid for overexpression of the <i>vstJ</i> gene                            | This study              |
| <b>Strain</b>                                         |                                                                               |                         |
| <i>E. coli</i>                                        |                                                                               |                         |
| NEB10 $\beta$                                         | Host for constructing BAC library                                             | NEB                     |
| DH5 $\alpha$                                          | Host for general cloning                                                      | Takara                  |
| BAA525                                                | Methylation-deficient donor for preparation of pUC118apr $\Delta$ vstJ        | ATCC                    |
| BL21 (DE3)                                            | Host for protein expression                                                   | Takara                  |
| <i>Streptomyces</i>                                   |                                                                               |                         |
| <i>S. versipellis</i> 4083-SVS6                       | VST producer (wt)                                                             | 5                       |
| <i>S. albus</i> J1074                                 | Host for heterologous expression                                              | 6                       |
| <i>S. albus</i> J1074::pKU503DverP10N24               | <i>S. albus</i> J1074 transformed with the VST biosynthetic gene cluster      | This study              |
| <i>S. albus</i> J1074::pKU503DverP10N24 $\Delta$ vstJ | <i>S. albus</i> J1074::pKU503DverP10N24 with the inactivated <i>vstJ</i> gene | This study              |

**Table S2.** Primers used in this study.

| Primers          | Sequences (5'-3')                       |                                                                                       |
|------------------|-----------------------------------------|---------------------------------------------------------------------------------------|
| vst-up-F         | 5'-ACATGGTCGCGAGAATCGAA-3'              | For screening of vst gene cluster from BAC library                                    |
| vst-up-R         | 5'-ATCTTGGTACCGCACCCGAC-3'              | For screening of vst gene cluster from BAC library                                    |
| vst-down-F       | 5'-GGACAGCGTCGAGTACGTCA-3'              | For screening of vst gene cluster from BAC library                                    |
| vst-down-R       | 5'-CCAGTTCGCTCTTGAACGT-3'               | For screening of vst gene cluster from BAC library                                    |
| vstJ-del-pre_F:  | 5'-GGGAAGCTTCCTCTTCGCGTCTGA<br>ACGCG-3' | For construction of pUC118aprΔvstJ ( <i>Hind</i> III site was indicated as underline) |
| vstJ-del-pre_R:  | 5'-GGGTCTAGACCGACGCCTTCTCGC<br>TTGTC-3' | For construction of pUC118aprΔvstJ ( <i>Xba</i> I site was indicated as underline)    |
| vstJ-del-post_F: | 5'-GGGTCTAGAAGACGAAAGTTCC<br>AGCTCT-3'  | For construction of pUC118aprΔvstJ ( <i>Hind</i> III site was indicated as underline) |
| vstJ-del-post_R: | 5'-GGGAAGCTTGACGGGCCAGGCCA<br>CGACCG-3' | For construction of pUC118aprΔvstJ ( <i>Xba</i> I site was indicated as underline)    |
| vstJ-F           | 5'-GGGCCATGG<br>CGCGGAAGCGAGCACCGAAG-3' | For construction of pHis8-vstJ ( <i>Nco</i> I site was indicated as underline)        |
| vstJ-R           | 5'-GGGGGATCC<br>TCAGCCGCGGAGGAAGAGGG-3' | For construction of pHis8-vstJ ( <i>Bam</i> HI site was indicated as underline)       |

**Table S3.** Deduced functions of ORFs in *vst* biosynthetic gene cluster.

| Gene | Amino acids (aa) | Proposed function                             | Blast hit protein [Origin]                                                                  | Identity/ Similarity (%) | Accession number |
|------|------------------|-----------------------------------------------|---------------------------------------------------------------------------------------------|--------------------------|------------------|
| -3   | 283              | rRNA methyltransferase                        | rRNA methyltransferase<br>[ <i>Streptomyces albulus</i> ]                                   | 77/80                    | WP_016574500     |
| -2   | 136              | Transcriptional regulator                     | MerR family transcriptional regulator<br>[ <i>Saccharomonospora cyanea</i> ]                | 62/67                    | WP_005452765     |
| -1   | 416              | MFS transporter                               | MFS transporter<br>[ <i>Saccharomonospora cyanea</i> ]                                      | 63/73                    | WP_005452767     |
| D    | 405              | Cytochrome P450 hydroxylase                   | Cytochrome P450 hydroxylase<br>[ <i>Streptomyces sp.</i> Amel2xE9]                          | 68/76                    | WP_019983477     |
| E    | 87               | Ferredoxin                                    | Ferredoxin<br>[ <i>Streptomyces sp.</i> 303MFCol5.2]                                        | 52/59                    | WP_020127680     |
| B1   | 288              | dTDP-sugar reductase                          | dTDP-4-dehydrorhamnose reductase<br>[ <i>Streptomyces sp.</i> HGB0020]                      | 64/68                    | WP_016430997     |
| B2   | 195              | dTDP-sugar 3,5-epimerase                      | TDP-4-dehydrorhamnose 3,5-epimerase, partial<br>[ <i>Streptomyces peucetius</i> ATCC 27952] | 64/70                    | ACR46366         |
| F    | 349              | 3-Oxoacyl-(acyl carrier protein) synthase III | 3-Oxoacyl-(acyl carrier protein) synthase III<br>[ <i>Streptomyces sp.</i> C]               | 64/68                    | WP_007269134     |
| G    | 146              | Unknown                                       | Cyclase/dehydrase<br>[ <i>Frankia sp.</i> Eu11c]                                            | 23/27                    | WP_013422986     |
| H    | 419              | Glycosyltransferase                           | KijA4<br>[ <i>Actinomadura kijaniata</i> ]                                                  | 45/54                    | ACB46466         |
| A1   | 8883             | Type I PKS                                    | AmphC<br>[ <i>Streptomyces nodosus</i> ]                                                    | 36/40                    | ACB46488.1       |
| A2   | 7529             | Type I PKS                                    | Polyketide synthase<br>[ <i>Streptomyces aizunensis</i> ]                                   | 47/53                    | AAX98191         |
| I    | 403              | Glycosyl transferase                          | ChlC7<br>[ <i>Streptomyces antibioticus</i> ]                                               | 43/51                    | AAZ77672         |
| B3   | 331              | dTDP-sugar 2,3-reductase                      | TylCH<br>[ <i>Streptomyces fradiae</i> ]                                                    | 62/69                    | AAD41821         |
| B4   | 249              | NDP-sugar 4-ketoreductase                     | UrdR<br>[ <i>Streptomyces fradiae</i> ]                                                     | 50/56                    | AAF72551         |
| B5   | 516              | dTDP-sugar 2,3-dehydratase                    | PyrC8<br>[ <i>Streptomyces rugosporus</i> ]                                                 | 50/58                    | AFV71305         |
| J    | 142              | [4+2] cycloaddition                           | Putative ribosomal protein L15P<br>[ <i>Streptomyces sp.</i> NRRL 11266]                    | 18/25                    | BAF73716         |
| A3   | 3589             | Type I PKS                                    | ChlA3<br>[ <i>Streptomyces antibioticus</i> ]                                               | 34/38                    | AAZ77696.1       |
| A4   | 3617             | Type I PKS                                    | KijS1<br>[ <i>Actinomadura kijaniata</i> ]                                                  | 29/32                    | ACB46488         |
| A5   | 1571             | Type I PKS                                    | ChlA6<br>[ <i>Streptomyces antibioticus</i> ]                                               | 53/59                    | AAZ77699         |
| K    | 514              | FAD-dependent oxidoreductase                  | KijA<br>[ <i>Actinomadura kijaniata</i> ]                                                   | 47/52                    | ACB46484         |
| B6   | 378              | Sugar O-methyltransferase                     | SpnI<br>[ <i>Saccharopolyspora spinosa</i> ]                                                | 40/47                    | AAG23270         |
| C5   | 343              | 3-Oxoacyl-ACP synthase III                    | RkD<br>[ <i>Streptomyces sp.</i> 88-682]                                                    | 51/60                    | ACZ65477         |
| C4   | 362              | Dehydratase                                   | ChlD4<br>[ <i>Streptomyces antibioticus</i> ]                                               | 52/59                    | AAZ77706         |
| C3   | 276              | Acyltransferase                               | ChlD3<br>[ <i>Streptomyces antibioticus</i> ]                                               | 59/64                    | AAZ77705         |
| C2   | 75               | Acyl carrier protein                          | ChlD2<br>[ <i>Streptomyces antibioticus</i> ]                                               | 48/59                    | AAZ77704         |
| C1   | 630              | FKbH-like protein                             | ChlD1<br>[ <i>Streptomyces antibioticus</i> ]                                               | 59/64                    | AAZ77703         |
| L    | 464              | Crotonyl-CoA reductase                        | Crotonyl-CoA reductase<br>[ <i>Streptomyces lasaliensis</i> ]                               | 75/80                    | CAQ64684         |



|           |     |                                            |                                                                                               |              |              |
|-----------|-----|--------------------------------------------|-----------------------------------------------------------------------------------------------|--------------|--------------|
| <i>R1</i> | 256 | SARP family regulator                      | <b>ChlF2</b><br>[ <i>Streptomyces antibioticus</i> ]                                          | <b>60/69</b> | AAZ77687     |
| <i>M</i>  | 242 | Type II thioesterase                       | <b>ChlK</b><br>[ <i>Streptomyces antibioticus</i> ]                                           | <b>52/57</b> | AAZ77688     |
| <i>N</i>  | 84  | Hypothetical protein                       | <b>Hypothetical protein</b><br>[ <i>Micromonospora sp. L5</i> ]                               | <b>43/55</b> | WP_013477259 |
| <i>R2</i> | 896 | Transcriptional regulator                  | <b>LuxR family transcriptional regulator</b><br>[ <i>Salinispora tropica</i> ]                | <b>38/46</b> | WP_028568330 |
| <i>O</i>  | 164 | Hypothetical protein                       | <b>YD repeat protein</b><br>[ <i>Micromonospora aurantiaca</i> ATCC 27029]                    | <b>5/7</b>   | WP_018412297 |
| <i>P</i>  | 589 | Dehydrogenase                              | <b>3-hydroxyacyl-CoA dehydrogenase</b><br>[ <i>Frankia sp. Eu11c</i> ]                        | <b>55/61</b> | WP_020866330 |
| <i>Q</i>  | 86  | Unknown                                    | <b>Hypothetical protein</b><br>[ <i>Streptomyces ambofaciens</i> ATCC 23877]                  | <b>33/38</b> | CAI78105     |
| <i>B7</i> | 355 | Glucose-1-phosphate<br>thymidyltransferase | <b>Glucose-1-phosphate thymidyltransferase</b><br>[ <i>Streptomyces peucetius</i> ATCC 27952] | <b>82/88</b> | ACR46363     |
| <i>B8</i> | 328 | dTDP-sugar 4,6-dehydratase                 | <b>TDP-D-glucose 4,6-dehydratase</b><br>[ <i>Streptomyces peucetius</i> ATCC 27952]           | <b>81/86</b> | ACR46364     |
| <i>R3</i> | 161 | Regulator                                  | <b>MarR-family regulatory protein</b><br>[ <i>Streptomyces sviveus</i> ATCC 29083]            | <b>78/81</b> | WP_007386486 |
| <i>+1</i> | 147 | Hypothetical protein                       | <b>Hypothetical protein</b><br>[ <i>Streptomyces hygrosopicus</i> ]                           | <b>63/68</b> | WP_014670231 |
| <i>+2</i> | 123 | Hypothetical protein                       | <b>Hypothetical protein</b><br>[ <i>Streptomyces afghaniensis</i> ]                           | <b>80/85</b> | WP_020273881 |
| <i>+3</i> | 115 | Hypothetical protein                       | <b>Hypothetical protein</b><br>[ <i>Chloroflexi bacterium oral taxon 439</i> ]                | <b>7/10</b>  | WP_022848429 |

**Table S4.**  $^1\text{H}$  (600 MHz) and  $^{13}\text{C}$  (150 MHz) NMR spectral data of compound **3** measured in dimethyl sulfoxide- $d_6$ .

| no. | $\delta_{\text{C}}$ | $\delta_{\text{H}}$ (H, mult, J(Hz))      | no. | $\delta_{\text{C}}$ | $\delta_{\text{H}}$ (H, mult, J(Hz)) |
|-----|---------------------|-------------------------------------------|-----|---------------------|--------------------------------------|
| 1   | 170.8               |                                           | 22  | 36.2                | 1.35 (1H, m)                         |
| 2   | 98.1                |                                           | 23  | 32.6                | 0.95 (1H, m) / 1.54 (1H, m)          |
| 3   | 177.1               |                                           | 24  | 25.4                | 1.20 (1H, m) / 1.42 (1H, m)          |
| 4   | 155.3               |                                           | 25  | 41.2                | 1.92                                 |
| 5   | 198.7               |                                           | 26  | 135.4               |                                      |
| 6   | 58.5                |                                           | 27  | 129.0               | 5.55 (1H, s)                         |
| 7   | 39.2                | 2.13 (1H, br)                             | 28  | 133.7               |                                      |
| 8   | 48.8                | 2.10 (1H, m)                              | 29  | 123.1               | 5.22 (1H, q, 6.6)                    |
| 9   | 214.5               |                                           | 30  | 14.0                | 1.59 (3H, d, 7.2)                    |
| 10  | 49.2                | 2.91 (1H, t, 8-8.5) / 2.04 (1H, t, 8-8.5) | 31  | 84.9                | 4.63 (1H, s) / 4.33 (1H, s)          |
| 11  | 69.3                | 3.62 (1H, dd, 8.4, 8.4)                   | 32  | 24.5                | 1.55 (m) / 2.48 *                    |
| 12  | 46.3                | 1.74 (1H, br)                             | 33  | 12.4                | 0.69                                 |
| 13  | 121.6               | 5.71 (1H, s)                              | 34  | 20.5                | 1.02 (3H, d, 5.4)                    |
| 14  | 163.5               |                                           | 35  | 23.2                | 1.50 (3H, s)                         |
| 15  | 51.6                | 3.66 (1H, brs)                            | 36  | 24.9                | 1.89 (m) / 1.56 (m)                  |
| 16  | 139.6               |                                           | 37  | 14.7                | 0.80                                 |
| 17  | 135.1               | 4.80 (1H, d, 8.4)                         | 38  | 22.6                | 0.81                                 |
| 18  | 29.5                | 2.33 (1H, m)                              | 39  | 14.2                | 0.66                                 |
| 19  | 42.7                | 0.89 (1H, m) / 1.28 (1H, m)               | 40  | 16.5                | 0.67                                 |
| 20  | 32.7                | 1.42 (1H, m)                              | 41  | 18.1                | 1.66 (3H, s)                         |
| 21  | 75.7                | 2.91 (1H, d)                              | 42  | 17.2                | 1.62 (3H, s)                         |

\*peak was read from 2D-NMR chart

**Table S5.**  $^1\text{H}$  (600 MHz) and  $^{13}\text{C}$  (150 MHz) NMR spectral data for compound **4** measured in  $\text{CDCl}_3$ .

| no. | $\delta_{\text{C}}$ | $\delta_{\text{H}}$ (H, mult, J(Hz)) | no. | $\delta_{\text{C}}$ | $\delta_{\text{H}}$ (H, mult, J(Hz))        |
|-----|---------------------|--------------------------------------|-----|---------------------|---------------------------------------------|
| 1   | 167.1               |                                      | 22  | 18.3                | 1.48 (m) / 1.51 (m)                         |
| 2   | 103.8               |                                      | 23  | 31.7                | 1.38 (m) / 1.42 (m)                         |
| 3   | 206.3               |                                      | 24  | 41.0                |                                             |
| 4   | 59.2                |                                      | 25  | 126.1               | 5.38 (s)                                    |
| 5   | 39.5                | 2.28 (m)                             | 26  | 135.7               |                                             |
| 6   | 49.7                | 2.42 (m)                             | 27  | 32.0                | 2.40 (m)                                    |
| 7   | 211.6               |                                      | 28  | 37.7                | 2.50 (dd, 8.4, 14.4) / 1.61 (dd, 3.6, 14.4) |
| 8   | 49.4                | 3.07 (dd, 7.2, 16.2) / 2.36 (m)      | 29  | 87.4                |                                             |
| 9   | 70.6                | 3.88 (dd, 9.0, 16.8)                 | 30  | 200.3               |                                             |
| 10  | 47.0                | 2.19 (t, 12.0)                       | 31  | 24.0                | 2.58 (m) / 1.92 (m)                         |
| 11  | 120.6               | 5.83 (s)                             | 32  | 12.2                | 0.89 (t, 7.8)                               |
| 12  | 135.0               |                                      | 33  | 18.3                | 1.06 (d, 2.4)                               |
| 13  | 58.3                | 3.43 (s)                             | 34  | 22.9                | 1.64 (s)                                    |
| 14  | 136.7               |                                      | 35  | 21.4                | 1.85 (m) / 1.89 (m)                         |
| 15  | 141.2               | 4.97 (d, 9.6)                        | 36  | 14.7                | 0.91 (t, 7.8)                               |
| 16  | 29.2                | 2.32 (m)                             | 37  | 18.2                | 0.79 (d, 6.6)                               |
| 17  | 35.8                | 0.93 (m) / 0.77 (dd, 4.2, 12.6)      | 38  | 16.5                | 0.97 (d, 6.6)                               |
| 18  | 34.7                | 1.47 (m)                             | 39  | 16.9                | 0.93 (d, 6.6)                               |
| 19  | 81.9                | 3.11 (dd, 1.2, 8.4)                  | 40  | 21.6                | 1.08 (s)                                    |
| 20  | 30.4                | 1.63 (m)                             | 41  | 21.7                | 1.70 (s)                                    |
| 21  | 26.3                | 1.23 (m) / 1.28 (m)                  | 42  | 19.9                | 1.07 (d, 3.6)                               |

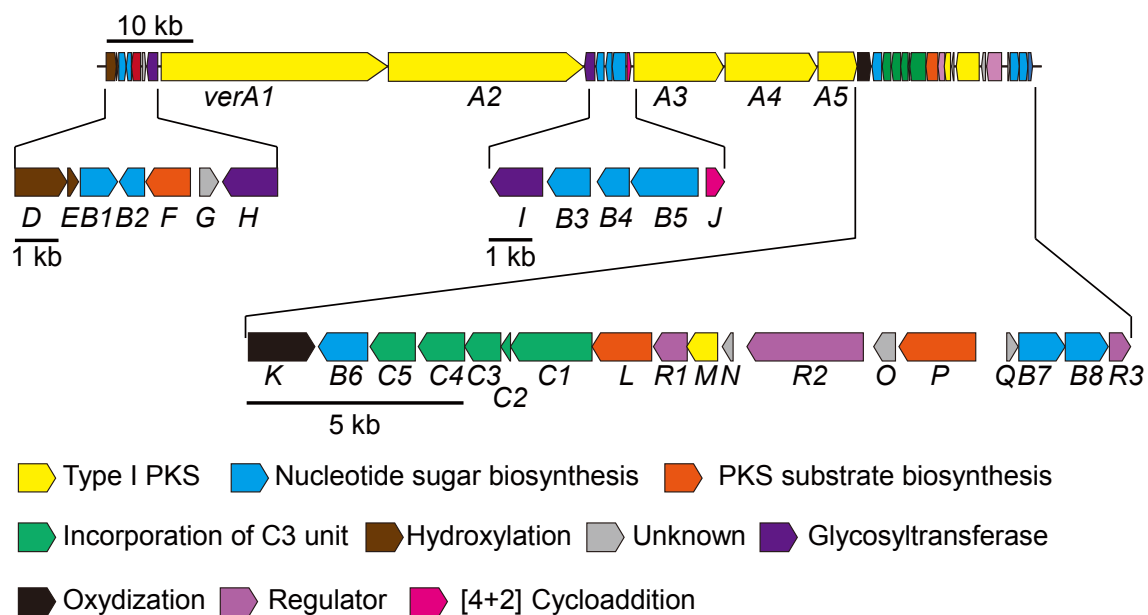

**Figure S1.** Organization of the biosynthetic gene cluster of versipelostatin in *S. versipellis* 4083-SVS6.

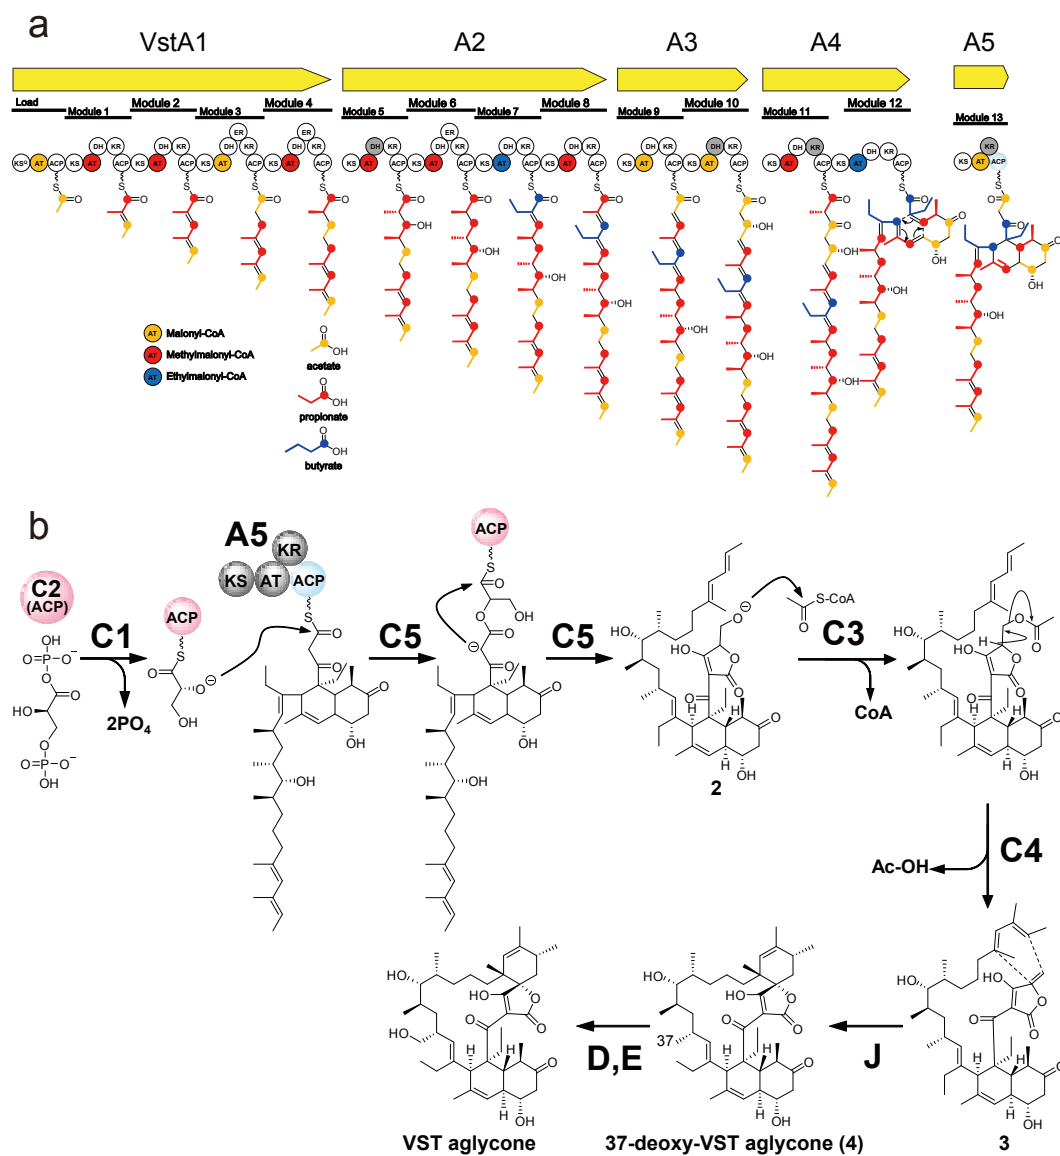

**Figure S2.** Putative biosynthetic pathway for the formation of VST aglycone.

(a) The deduced modules and domain organization of type I PKS encoded by *vstA1* to *A5*. The bold lines and closed circle indicate the incorporation and labeling pattern of  $^{13}\text{C}$ -labeled acetate (yellow), propionate (red) and butyrate (blue) into VST detected in previous experiments.<sup>5</sup> The loading module includes a KSQ domain, which catalyzes decarboxylation of malonyl-ACP to start chain elongation. The L- or D-configuration was deduced from the ketoreductase sequence (Fig. S5). KR11, KR13, DH5, DH10 domains (filled with gray color) are predicted to be inactive from the structure of the VST. Whether DH11 is active or not is unclear since the requisite hydroxyl group is absent due to inactive KR11. (b) Putative biosynthetic pathway of incorporation of tricarbon glyceryl unit into the VST aglycone and subsequent tailoring reactions catalyzed by VstC1–C5. The [4+2]-cycloaddition is catalyzed by VstJ and the following hydroxyl at C-37 is installed by the action of VstD (a cytochrome P450 protein) and VstE (a ferredoxin protein).

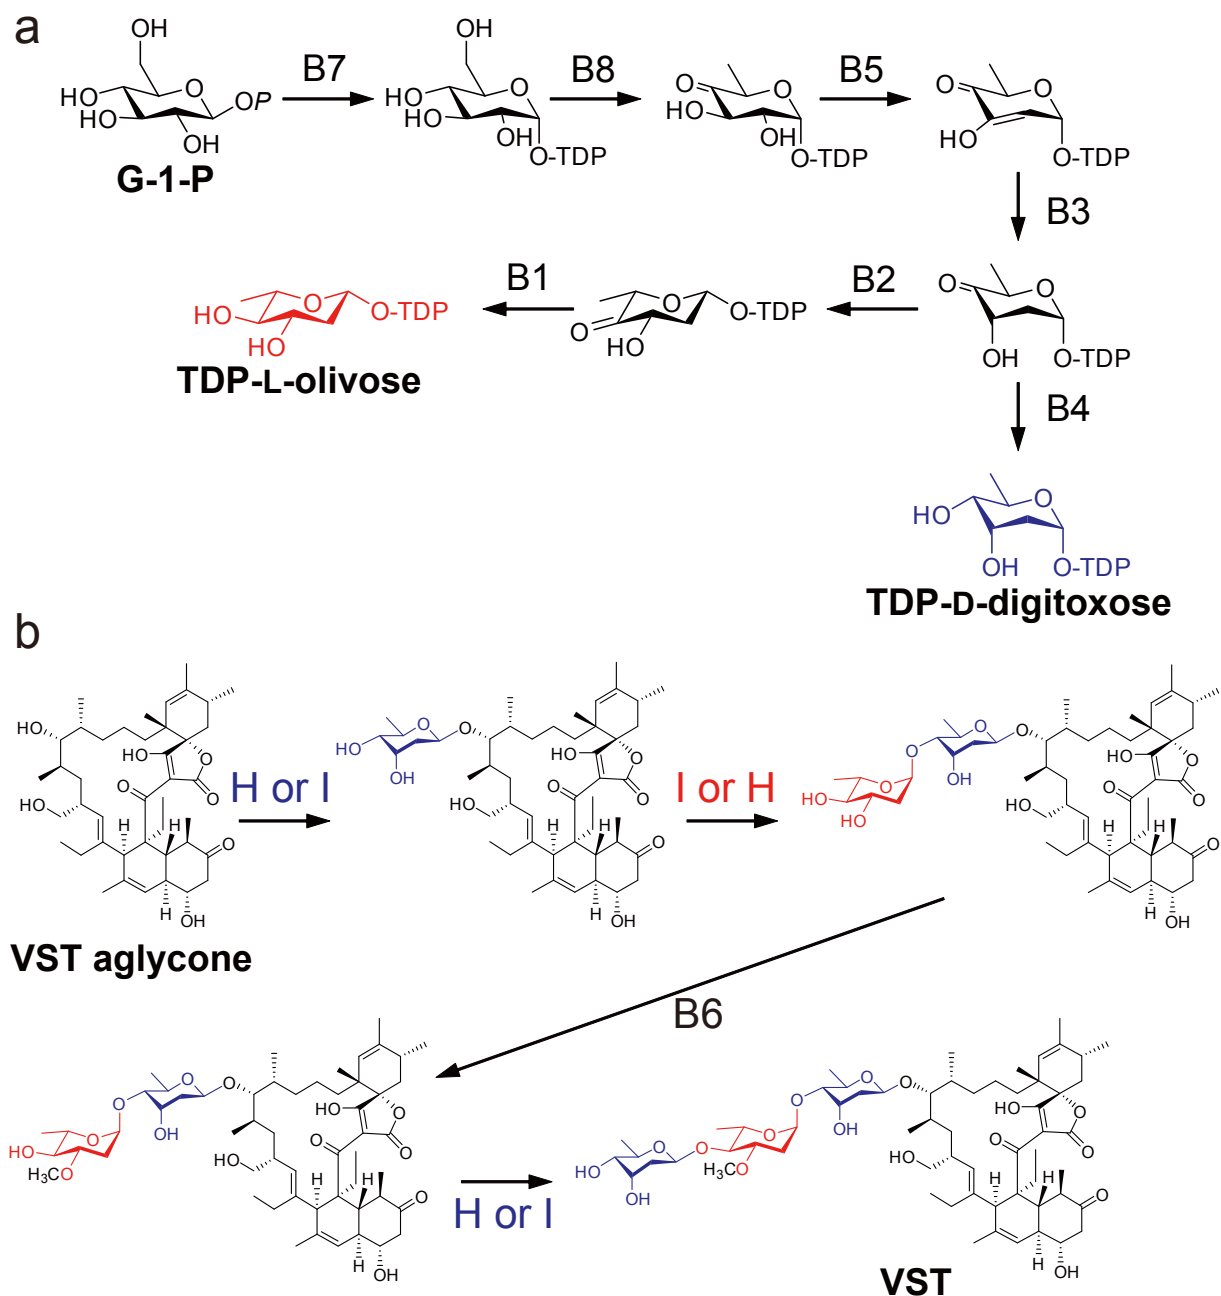

**Figure S3.** (a) Proposed biosynthetic pathway leading to TDP-D-digitoxose and TDP-L-olivose. (b) Proposed glycosyltransferase reactions catalyzed by VstH and VstI in VST biosynthesis.



|      |            |            |            |            |             |
|------|------------|------------|------------|------------|-------------|
|      | 1          |            |            |            | 50          |
| KR1  | GTVLITGGT  | TLGGVVARHL | VSEHGVRHLL | LTGRRGPEAP | GVPELRAELT  |
| KR5  | GTVLITGGT  | TLGTLARHL  | VGEHGVRHLL | LASRRGPDAP | GAVELVAELT  |
| KR2  | GTVLITGGT  | TLGAAVACHL | VSEHGARHLL | LASRSGASAP | GALELEAELT  |
| KR3  | GTILITGGT  | TLATATARHL | VTQHGARHLL | LASRSGPNAP | GAHELQTELT  |
| KR4  | GTILITGGT  | TLATATARHL | VTHHGARHLL | LASRSGPNAP | GAHELQTELT  |
| KR6  | GTILITGGT  | TLATATARHL | VTHHGARHLL | LASRSGPNAP | GAHELQTELT  |
| KR11 | GTILITGGT  | TLATATARHL | VTQHGARHLL | LASRSGPNAP | GAHELQTELT  |
| KR7  | GTILITGGT  | TLGAAARHL  | VHHHGARHLL | LASRSGANAP | GALELEAELT  |
| KR9  | GTILITGGT  | TLGAAARHL  | VSEHGARHLL | LASRSGPNAP | GALELEAELT  |
| KR10 | GTILITGGT  | TLATATARHL | VTHHGARHLL | LASRSGPNAP | GALELEAELT  |
| KR8  | GTILITGGT  | TLGAAARHL  | VSEHGARHLL | LASRSGPNAP | GALELEAELT  |
| KR12 | GTILITGGT  | TLGAAARHL  | VSEHGARHLL | LASRSGPNAP | GAHELEAELT  |
| KR13 | GTALVSGAAS | VLGGQVARWL | AGRGARRLLL | AVGAREAEAP | EVVKLSAELG  |
|      | 51         |            |            |            | 100         |
| KR1  | EYGAEVTVTA | CDTGDPEALA | ALLDAVPAEH | PLTAVVHAAG | VLDDAVTTSL  |
| KR5  | AHGAQVTLAS | CDTGDPDQLT | ALLAGVPAER | RLTAVVHTAG | ALDDAVIENL  |
| KR2  | AHGAHITLTA | CDTGDPDQLG | DLLAAVPDDH | PLTAVIHTAG | VLDDAVLENL  |
| KR3  | AHGAHITLTT | CDTGNPDQLA | DLLAAVPDDH | PLTAVIHTAG | TLHDATLHNL  |
| KR4  | AHGAHITLTT | CDTGNPDQLA | DLLAAVPDDH | PLTAVIHTAG | TLHDATLHNL  |
| KR6  | AHGAHITLTT | CDTGNPDQLR | DLLAAVPDDH | PLTAVIHTAG | TLHDATLDNL  |
| KR11 | AHGAHITLTT | CDTGNPDQLA | DLLAAVPDDH | PLTAVIHTAG | TLHDATLHNL  |
| KR7  | AHGAHITLTT | CDTGNPTALQ | ELLDIAPHDH | PLTAVIHTAG | TLHDATLDNL  |
| KR9  | AHGAHITLTT | CDTGNPTALQ | ELLDIAPHDH | PLTAVIHTAG | TLHDATLHNL  |
| KR10 | AHGAHITLTT | CDTGNPTALQ | ELLDIAPHDH | PLTAVIHTAG | TLHDAVLENL  |
| KR8  | AHGAHITLTT | CDTGNPDQLT | ALLNAIPDDH | PLTAVIHTAG | TLHDATLDNL  |
| KR12 | AHGAHITLTT | CDTGNPDQLR | DLLAAVPDDH | PLTAVIHTAG | TLDDAVIENL  |
| KR13 | DLGAEVTVAV | CDPADRAALA | GVLAVVPDGA | PLTAVVHVGA | AGEAGGVRAL  |
|      | 101        |            |            |            | 150         |
| KR1  | TAQQLDTVLH | PKADAAWHLH | RLTRHQDLTA | FVLFSVIGT  | AGGAGQANYA  |
| KR5  | TAEQLETILR | SKAEAAWHLH | RLTKDLDLAA | FVLYSSLAGT | LG DAGAASYA |
| KR2  | TPDHLAATLH | PKADAAWHLH | SLTKDLDLAA | FVLYSSVAGT | LGSPGQAAYA  |
| KR3  | TPDHIDTVLH | PKADTAWHLH | HLTQNLDLAA | FVLYSSAAGT | LG NPGQAAYA |
| KR4  | TPDHIDTVLH | PKADTAWHLH | HLTQNLDLAA | FVLYSSAAGT | LG NPGQAAYA |
| KR6  | TPDHIDTVLH | PKADTAWHLH | HLTQHMLLAA | FVLYSSAAGT | LG NPGQAAYA |
| KR11 | TPDHIDTVLH | PKADTAWHLH | HLTQNLDLAA | FVLYSSAAGT | LG NPGQAAYA |
| KR7  | TPDHIDTVLH | PKADTAWHLH | HLTKNLDLAA | FVLYSSVAGT | LGSPGQAAYA  |
| KR9  | TPDHIDTVLH | PKADTAWHLH | HLTKNLDLAA | FVLYSSAAGT | LG NPGQAAYA |
| KR10 | TPDHIDTVLH | PKADTAWHLH | HLTKNLDLAA | FVLYSSAAGT | LG NPGQAAYA |
| KR8  | TPDHIDTVLH | PKADTAWHLH | HLTQHMLLAA | FVLYSSAAGT | LGSPGQAAYA  |
| KR12 | TPRIDTVLH  | PKADTAWHLH | HLTKNLDLAA | FVLYSSVAGT | LGSPGQAAYA  |
| KR13 | ..ERMDRALV | RDVAAVAHL  | ELTGGADLRV | FTVFSVPSGL | ...PGYGGGS  |
|      | 151        |            |            |            | 180         |
| KR1  | AANAFLDALA | AHRHAQGLPA | TSVAWGLWAT |            |             |
| KR5  | AANSFLDALA | THRHADGLPA | MSLWGFWDQ  |            |             |
| KR2  | AANTFLDALA | THRHTHGLPA | TSLAWGLWEE |            |             |
| KR3  | TANTFLDALA | THRHTHGQPA | TSLAWGHWAQ |            |             |
| KR4  | TANTFLDALA | THRHTHGQPA | TSLAWGHWAQ |            |             |
| KR6  | AANTFLDALA | THRHTHGQPA | TSLAWGHWAE |            |             |
| KR11 | TANTFLDALA | THRHTHGLPA | TALAWDTSAE |            |             |
| KR7  | AANTFLDALA | THRHTHGLPA | TSLAWGYWAE |            |             |
| KR9  | TANTFLDALA | THRHTHGLPA | TSLAWGHWAE |            |             |
| KR10 | TANTFLDALA | THRHTHGQPA | TSLAWGLWEE |            |             |
| KR8  | AANTFLDALA | THRHTHGLPA | TSLAWGHWAE |            |             |
| KR12 | AANTFLDALA | THRHTHGLPA | TSLAWGLWEE |            |             |
| KR13 | VAEACVEALV | RGRRARGLPG | LSVLSGPLEE |            |             |

**Figure S5.** Amino acid sequence alignment of KR domains of VstA1-A5.

The catalytic amino acids are marked by purple shading. The yellow shading indicates the NADPH binding motif. KR13 lacks the NADPH binding motifs and the K112, Y149 and N153 residues required for the reductase activity. All of the KR domains except for KR13 contains LD(H)D residues (shown in light blue shade), a motif specific for D-configuration (B1-type).<sup>8</sup> Although the KR domain in Module 11 seems to be active as deduced from sequence analysis, it should be inactive as predicted from the structure of VST.



```

DH_7      PTHHGQPTTTHPLLTAIIHAADTHRTTLTGRINTTTHPYLTDHAVNGTPLLPGTAYLEMA 60
DH_12    PTHHGQPTTTHPLLTAIIHAADTHRTTLTGRINTTTHPYLTDHAVNGTPLLPGTAYLEMA 60
DH_5      PTLGLAATTHPFLGAIIDTAD-DRTLFTGRISLTTHPWLNDHAVAGTVILPGTAYLDLA 59
DH_11    PTLGLQRTTTHPLLGAIIHTAD-DRTLYTGRISLTTHPWLNDHAVAGTVILPGTAYLDLA 59
DH_8      PTALGQRTTTHPLLGAIIETADTRVLFTRISLTAHAWLNDHAVAGTVILPGTAYLDLA 60
DH_10    PTLGQRTTTHPFLGAIETAGTDRFLFTGRISLTTHPWLNDHAVAGTVILPGTAYLDLA 60
DH_2      PTLGLAATTHPFLGAIIDTAD-DRTLFTGRISLTTHPWLNDHAVAGTVILPGTAYLDLA 59
DH_4      PTLGQRTTTHPFLGAIETAGTDRFLFTGRISLTTHPWLNDHAVAGTVILPGTAYLDLA 59
DH_3      PTALGLAATTHPLLGAIIHTAD-DRTLYTGRISLTTHPWLNDHAVAGTVILPGTAYLDLA 59
DH_9      PTALGLAATTHPLLGAIIHTAD-DRTLYTGRISLTTHPWLNDHAVAGTVILPGTAYLDLA 59
DH_6      LAGLGLTATTHPFLGAIHTAD-DRTLYTGRISLTTHPWLNDHAVAGTLLPGTAYLDLA 59
DH_1      VTSAGLDRSDHPMLGAASVAGDDGFVLTGRSLDTHPWIAHVVLDTVLLPGSAFAELA 60

DH_7      LHAADQVGLNHVEELVIEAPLTLPENGVYDLQVTVGPADDGRRRPIVHSRPAITVSEGS 120
DH_12    LFAAAQVGLNHVEELALEAPLVLPERKVDLQVTVGPDDGAGRRRPIIHSRPAAKPSAGG 120
DH_5      LHAATHGTHTGQIQLTLHQPLVLT-DTPVDLQVTVD-----AQQGQITIHSPAPDT--- 110
DH_11    LHTGQH-----VQELTLHHPVLVLT-DTPVDLQVTVD-----AQQGQITIHSPAPDT--- 104
DH_8      LHAADHTDHTGQIQLTLHQPLVLT-DTPVDLQVTVD-----AQQGQITIHSPAPDT--- 111
DH_10    LHAADRMGLGEGVEKLTDSQSLSPEDGTVLQVTVPAADSGQRQITIHSPAPSDP---- 117
DH_2      LHAATHGTHTGQIQLTLHQPLTLT-DTPVDLQVTVD-----AQQGQITIHSPRT---- 106
DH_4      LHAATHDHTGQIQLTLHQPLTLT-DTPVDLQVTVD-----SQGQITIHSPAPDT--- 110
DH_3      LHTATHDHTGQIQLTLHQPLTLT-DTPVDLQVTVD-----SQGQITIHSPAPDT--- 110
DH_9      LHTATHDHTGQIQLTLHQPLTLT-DTPVDLQVTVD-----SQGQITIHSPAPDT--- 110
DH_6      LHTGQH-----VQELTLHHPVLVLT-DTPVDLQVTVD-----SQGQITIHSPAPDT--- 105
DH_1      LEAGAQAQGGCRVEELVLEAPLALADDHAVQIQVTVGDPDEEGHRPLAVHSRPN----- 114

DH_7      PDDAADLPWRHATGTLTSTEEE-----PPALDGRSWPPADSSPLDLDFGYERIAQH 173
DH_12    PDDASDIPWRHATGTLTSTEEA-----PPAE-GDEAWPPAGTAPIDLDFGYERIAQH 172
DH_5      --DDADPAWTTTHATGQLTTEVTS-----VAPDT-PTTWPPTNATPISLDGFYDHLA 160
DH_11    --DDADPTWTTTHATGQLTTDTP-----VPHE-ATTWPPPEATPIELDDHYDRFADI 154
DH_8      --DDADPAWTTTHATGQLTTTPPG-----TAPDT-PTTWPPTNATPISLDGFYDHLA 161
DH_10    --DEPG-TWTRHATGQLTTTPPG-----TAPDT-PTTWPPTNATPISLDGFYDHLA 166
DH_2      --DNDAAWTTTHATGQLTTDTS-----TVPET-AAAWPPPATPIALDFGYDHLADR 155
DH_4      --DDADPTWTTTHATGQLTTDTAS-----TVPET-AAAWPPPATPIALDFGYDHLADR 160
DH_3      --DDADPTWTTTHATGQLTTDTAT-----DIPATDAAAWPPLDATPISLDGFYDHLADR 161
DH_9      --DDADPTWTTTHATGQLTTDTAT-----DIPATDAAAWPPLDATPISLDGFYDHLADR 161
DH_6      --DDADPTWTTTHATGQLTTDTVT-----DIPATDAAAWPPLDATPISLDGFYDHLADR 156
DH_1      --DSADRPWRHATGTLSDGREGGGGGGGAGVMSAWPPVAVPDPVPSGLYARLAEQ 172

DH_7      GYHYGPVFQGLTAAWQHEDSIYAEVTLPEGTD-----AGYGVHPALLDAA 219
DH_12    GYHYGPVFQGLTAAWNGDDHTCAEAALPEGTD-----AGYGIHPALLDAA 218
DH_5      GVDYGPVFQGLTAAWREDNELYAEVDLPEDTD-----TGYGIHPALLDAA 206
DH_11    GVDYGPVFQGLTAAWRHGNDLYAEVTLPEGTD-----TGYGIHPALLDAA 200
DH_8      GYHYGPAFQGLTAAWRHGNDLYAEVTLPEGTD-----TGYGIHPALLDAA 207
DH_10    GYHYGPAFQALTTAWRHGNDLYAEVTLPEGTD-----TGHGIHPALLDAA 212
DH_2      GYHYGPAFQGLTTAWRHGDELHAEVTLPEGTD-----TGFVHPALLDAA 201
DH_4      GYHYGPAFQALTTAWRHGDELHAEVTLPEGTD-----TGFVHPALLDAA 206
DH_3      GYHYGPAFQALTTAWRHGNDLYSEVTLPEGTD-----TGFVHPALLDAA 207
DH_9      GYHYGPAFQALTTAWRHGNDLYSEVTLPEGTD-----TGFVHPALLDAA 207
DH_6      GYHYGPAFQALTTAWRHGNDLYAEVTLPEGTD-----TGYGIHPALLDAA 202
DH_1      GVVYGPMPFQGLRAAWQLDGLFAEVDLPQDDAEPSVLAARSDGVRAGAGFVHPALLDAT 232

DH_7      LHATTATVG-DDVYAGKVYLPFVWSGVTLHNTA-ASGTVRVHLTRPDDERISVRLRDESG 277
DH_12    LQGSLATLG-EDAMD-QVQLPFSWRGVTLHASG-P-AALRAHLTPTGSDSIALRVLDGAG 274
DH_5      LQATTHPAFVGETGTATPVMPFWSNGITLHTPT-TPITLRAHLTPAGDTSFAIHLADSAD 265
DH_11    LQVSAHTSPTNEANT-TPVMPFWSGTGITLHTPT-TPITLRAHLTPTNDTSVAIALTSETG 258
DH_8      FHPLLT-----TDTP-AIRLPFSWTGITLHTPT-TSALRATITTTSDTTLTIHLTDTTG 261
DH_10    LHPLITNN--ADTD-AIRLPFSWTGIALHATT-AATLVRVLTPTSDTTLAIHLTDTSG 268
DH_2      LHPLLTNN--DTGT-EIRLPFSWTGITLHTTT-APTALRATITTTSDTTLTIHLTDTTG 256
DH_4      LHPLLTNT--DTGS-EIRLPFSWTGITLHTTTAASTLHVHLTPTSDTTFAIALTSTSG 263
DH_3      LHPLITNNNTADTD-AIRLPFSWTGIALHATT-AATALRVHLTTSDTTLAIHLTDTSG 265
DH_9      LHPLITNNNTADTD-AIRLPFSWTGIALHATT-AATALRVHLTTSDTTLAIHLTDTSG 265
DH_6      LHPLITNNNTADTD-AIRLPFSWTGIALHATT-AATLVRVHLTTSDTTLAIHLTDTSG 260
DH_1      LHALAVNGLLGEGQ-EIRLPFSWTGVELHAAG--ATSVRVRITESGDAVTVTITDTAG 289

DH_7      EAVATVRAVAVRPIDPAKLAV 298
DH_12    QPVVTVDALTVRPLDTRRLAS 295
DH_5      ESILTIIDALAVRPIDIDRFRA 286
DH_11    EPVATIQTLTVRPVDPAQLTT 279
DH_8      EPVATIDALTVRVPDPAQLAT 282
DH_10    QPIATIEALTVRVPDPAQLTT 289
DH_2      EPVATIQGLTLRPIIDAAQLAT 277
DH_4      EPVATIDALTVRVPDPTQLAA 284
DH_3      QPIATIEALTVRVPDPAQLAT 286
DH_9      QPIATIEALTVRVPDPAQLAT 286
DH_6      QPIATIEALTVRVPDPTQLAA 281
DH_1      VPVAVVESLTTTRPVSAQRLLGA 310

```

**Figure S6.** Amino acid sequence alignment of DH domains of VstA1-A4. The catalytic amino acids are marked by purple shading. DH domains in Module 5 and Module 10 seem to be inactive based on the fact that VST structure does not have the corresponding double bonds.

```

ER_4   TVDNLALVPHPTDTPPLPPGHVRVAVHAAGINFRDLLVTLGMVDDPRPIGGEGAGTITA 60
ER_6   TVDNLALVPHPTDTPPLPPGHVRVAVHAAGINFRDLLVTLGMVDDPRPIGGEGAGTITA 60
ER_3   TVDNLALVPHPADTTPPLPPGHVRVAVHAAGINFRDLLVTLGMVDDPRPIGGEGAGTITA 60

ER_4   APDVTDYQPGDRVMGLFPHTAPHITVHQHHIAPVPHLLTTAQAATTPVAFLTAYHALHH 120
ER_6   APDVTDYQPGDRVMGLFPHTAPHITVHQHHIAPVPHLLTTAQAATTPVAFLTAYHALHH 120
ER_3   APDVTDYQPGDRVMGLFPHTAPHITVHQHHIAPVPHLLTTAQAATTPVAFLTAYHALHH 120

ER_4   AHLQPGEKVLIHAGTGGVGMAAIQIARHLGADIYATAHPTKWPTLHHLGLDQHIIASSR 180
ER_6   AHLQPGEKVLIHAGTGGVGMAAIQIARHLGADIYATAHPTKWPTLHHLGLDQHIIASSR 180
ER_3   AHLQPGEKVLIHAGTGGVGMAAIQIARHLGADIYATAHPTKWPTLHHLGLDQHIIASSR 180

ER_4   LDFEHHFRTTAPHGLDVILNSLAGEHTDASRLLNPTTGRFIEMGKTDIREPAQLAAEH 240
ER_6   LDFEHHFRTTAPHGLDVILNSLAGEHTDASRLLNPTTGRFIEMGKTDIREPAQLAAEH 240
ER_3   LDFEHHFRTTAPHGLDVILNSLAGEHTDASRLLNPTTGRFIEMGKTDIREPAQLAAEH 240

ER_4   HLTYPQAFDLITQTPPHIHMLHHLTHLLTQHHLTLPVTTWDIRHTPHAFRHL SQARH 300
ER_6   HLTYPQAFDLITQTPPHIHMLHHLTHLLTQHHLTLPVTTWDIRHTPHAFRHL SQARH 300
ER_3   HLTYPQAFDLITQTPPHIHMLHHLTHLLTQHHLTLPVTTWDIRHTPHAFRHL SQARH 300

ER_4   GKLAL 306
ER_6   GKLAL 306
ER_3   GKLAL 306

```

**Figure S7.** Amino acid sequence alignment of ER domains of VstA1 and A2.

The catalytic amino acids are marked by purple shading. The yellow shading indicates the NADPH binding motif. All of the ER domains are specific for D-configuration (Y residue specific for L-configuration was not observed at V residue position shown in light blue shade)<sup>9</sup>

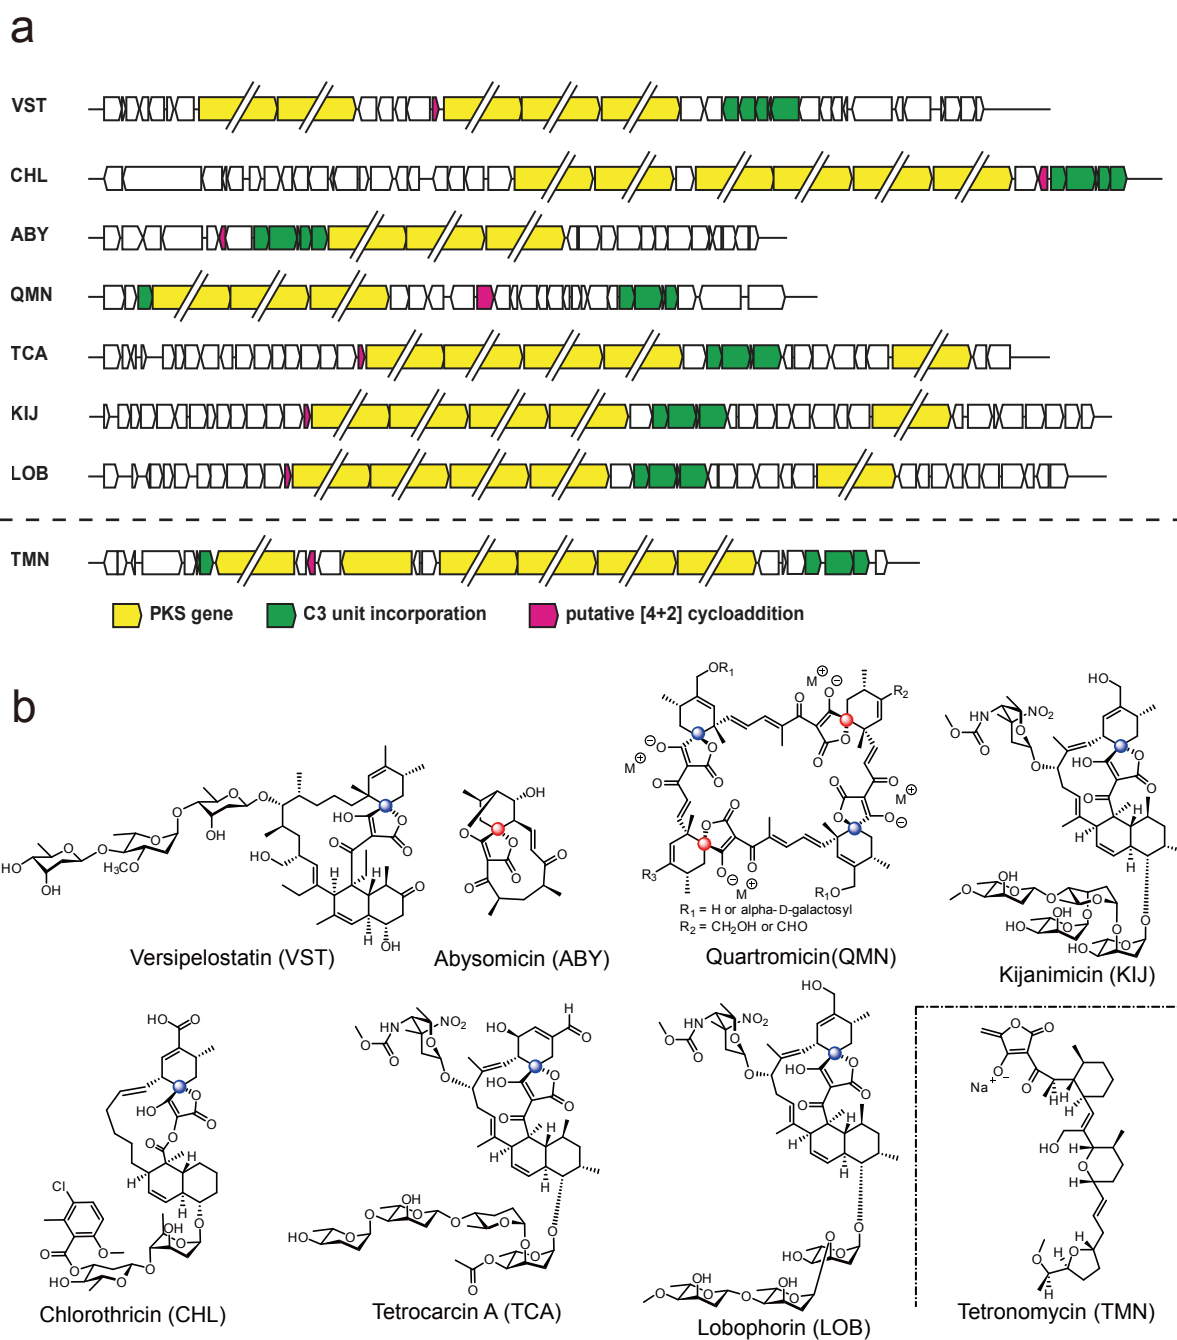

**Figure S8.** Biosynthetic gene clusters and structures of (spiro)tetronate antibiotics.

(a) All known biosynthetic gene clusters of spirotetronate antibiotics, VST, CHL, QMN, TCA, LOB, ABY, and KIJ, contain *vstJ* homologues. Furthermore, the biosynthetic gene cluster of tetronomycin (TMN),<sup>10</sup> that is not a spirotetronate, but a tetronate compound, also contains a *vstJ* homologue. (b) The *R*- or *S*-configuration of the spirocarbon is presented as red or blue circle, respectively.

**a**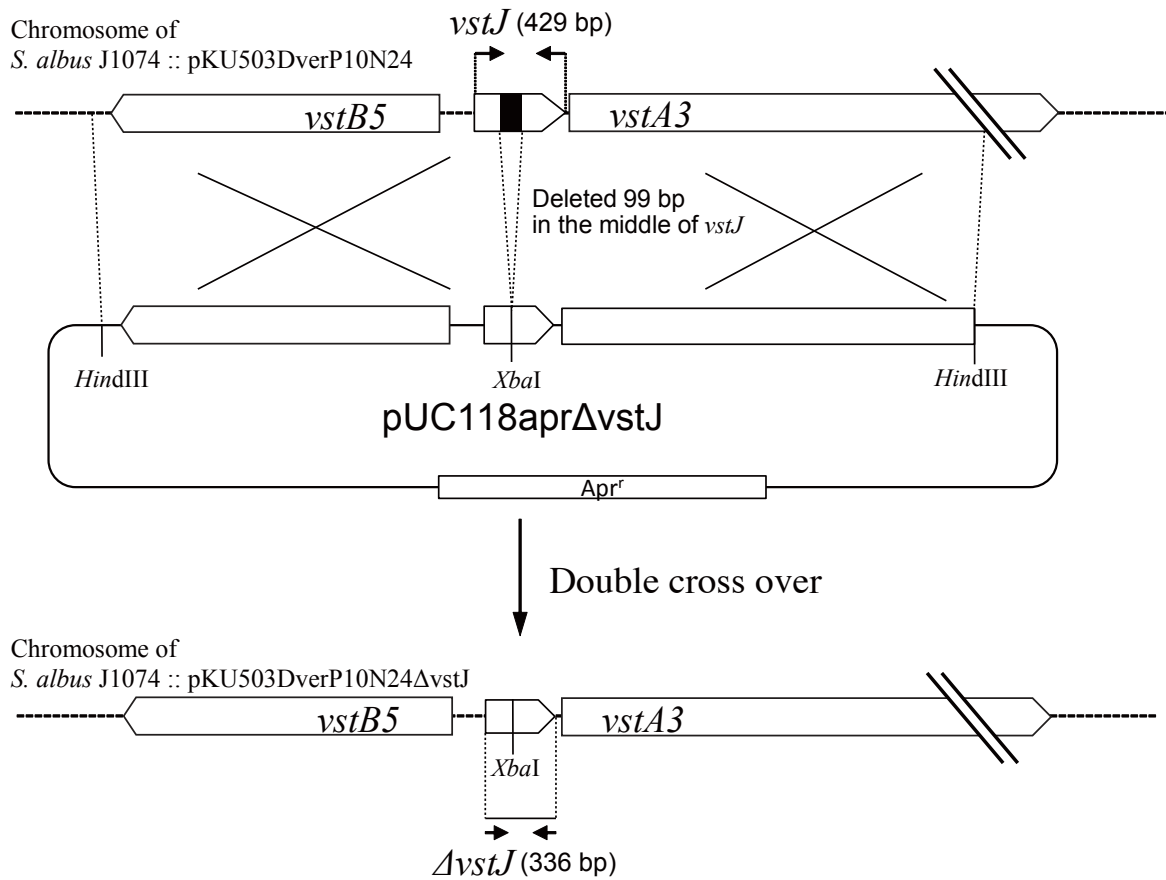**b**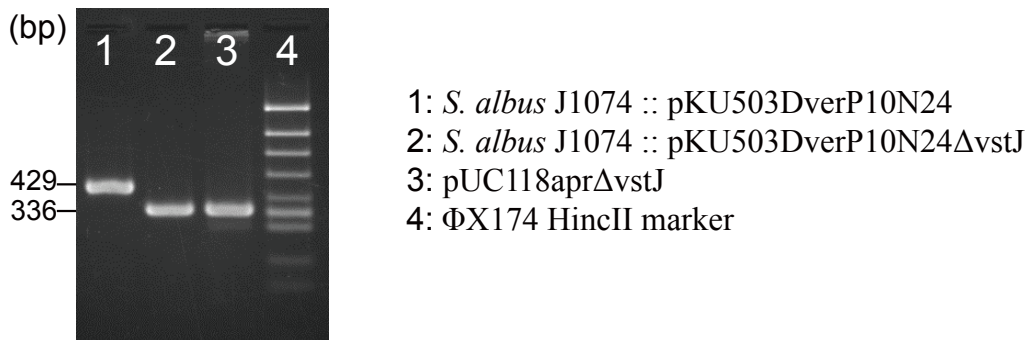

**Figure S9.** Disruption of *vstJ* in the genome of *S. albus* J1074:: pKU503DverP10N24.

(A) Scheme for disruption of *vstJ*. (B) Confirmation with PCR. Disruption of *vstJ* was confirmed by PCR. PCR with genomic DNA from the *S. albus* J1074:: pKU503DverP10N24 strain gave a 429-bp DNA fragment (lane 1), whereas PCR with genomic DNA from the mutant strains gave a 336-bp fragment (lanes 2 and 3).

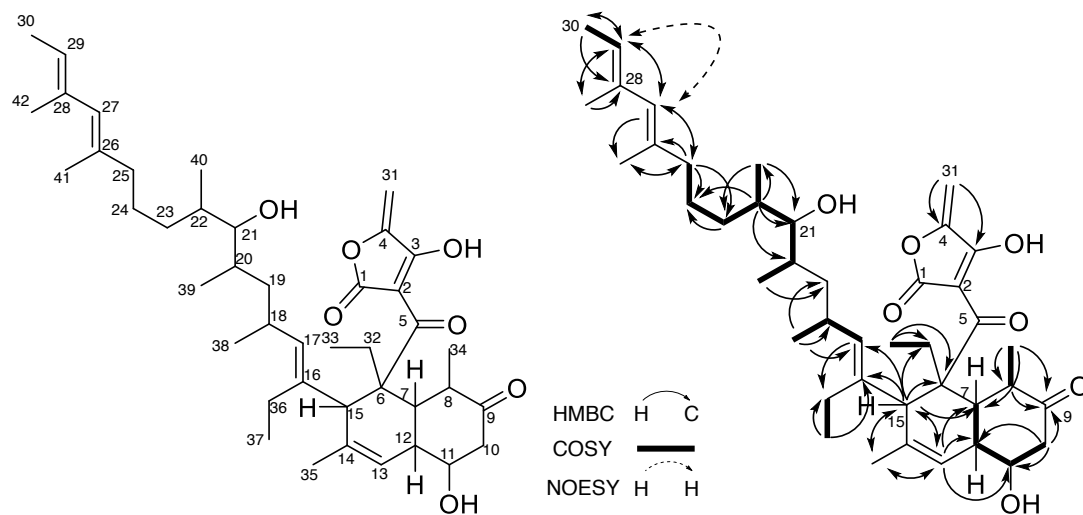

**Figure S10.** Structure of **3** and the correlations of HMBC, DQF-COSY, and NOESY of **3**.

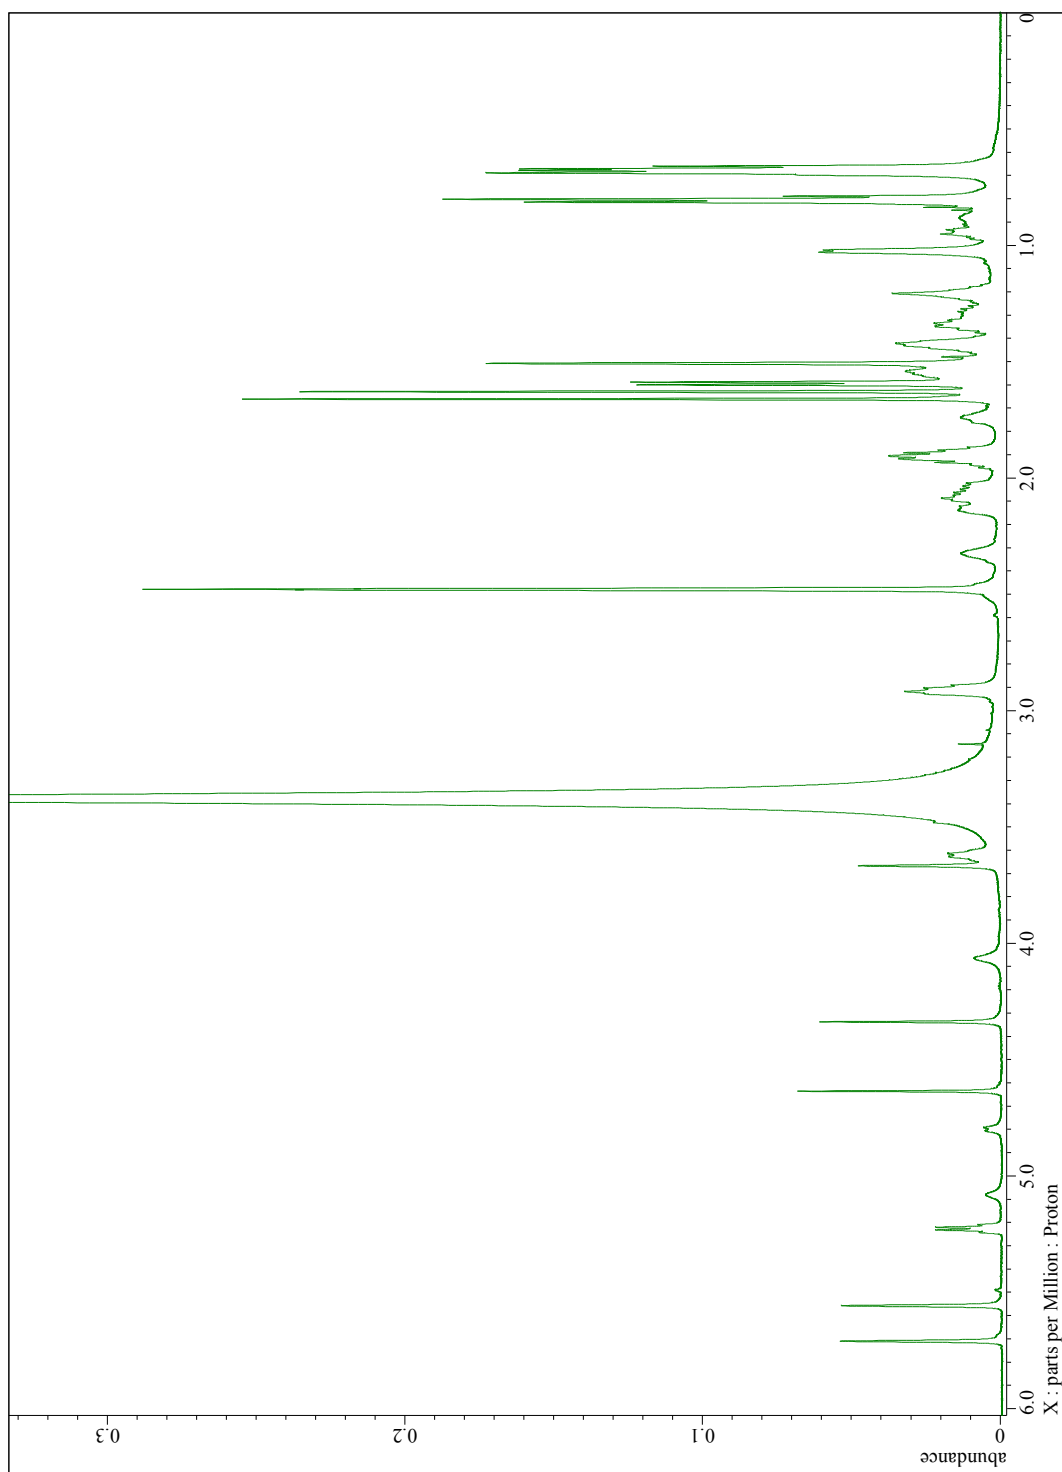

**Figure S11.**  $^1\text{H}$  NMR ( $\text{DMSO-}d_6$ ) spectrum for **3**.

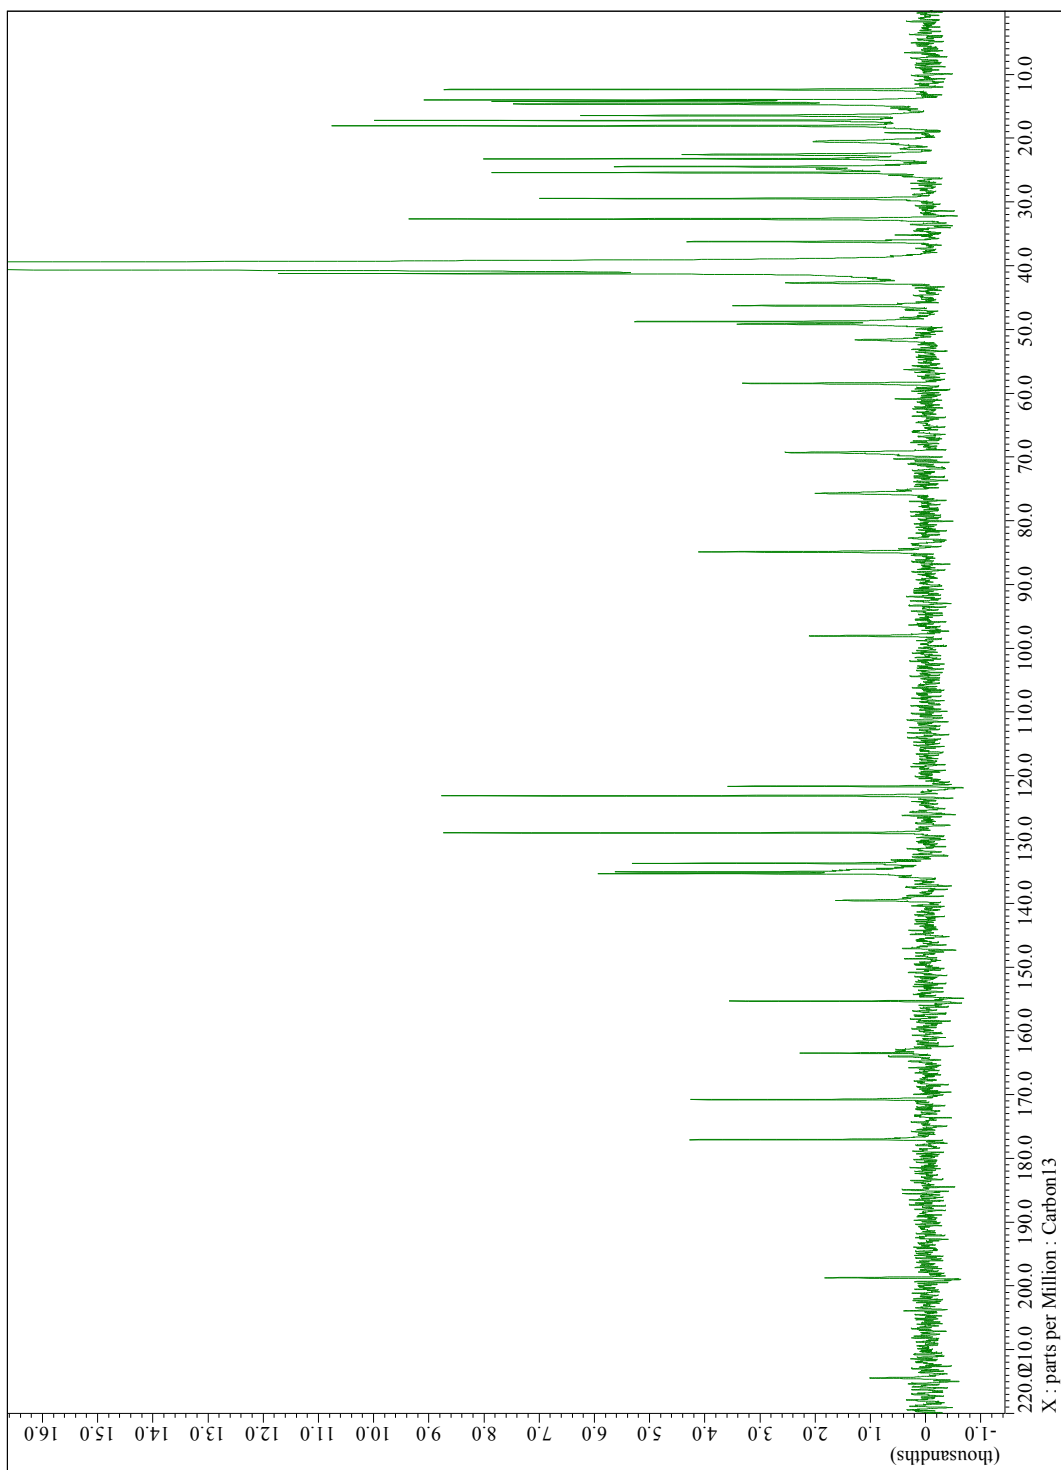

**Figure S12.**  $^{13}\text{C}$  NMR ( $\text{DMSO-}d_6$ ) spectrum for 3.

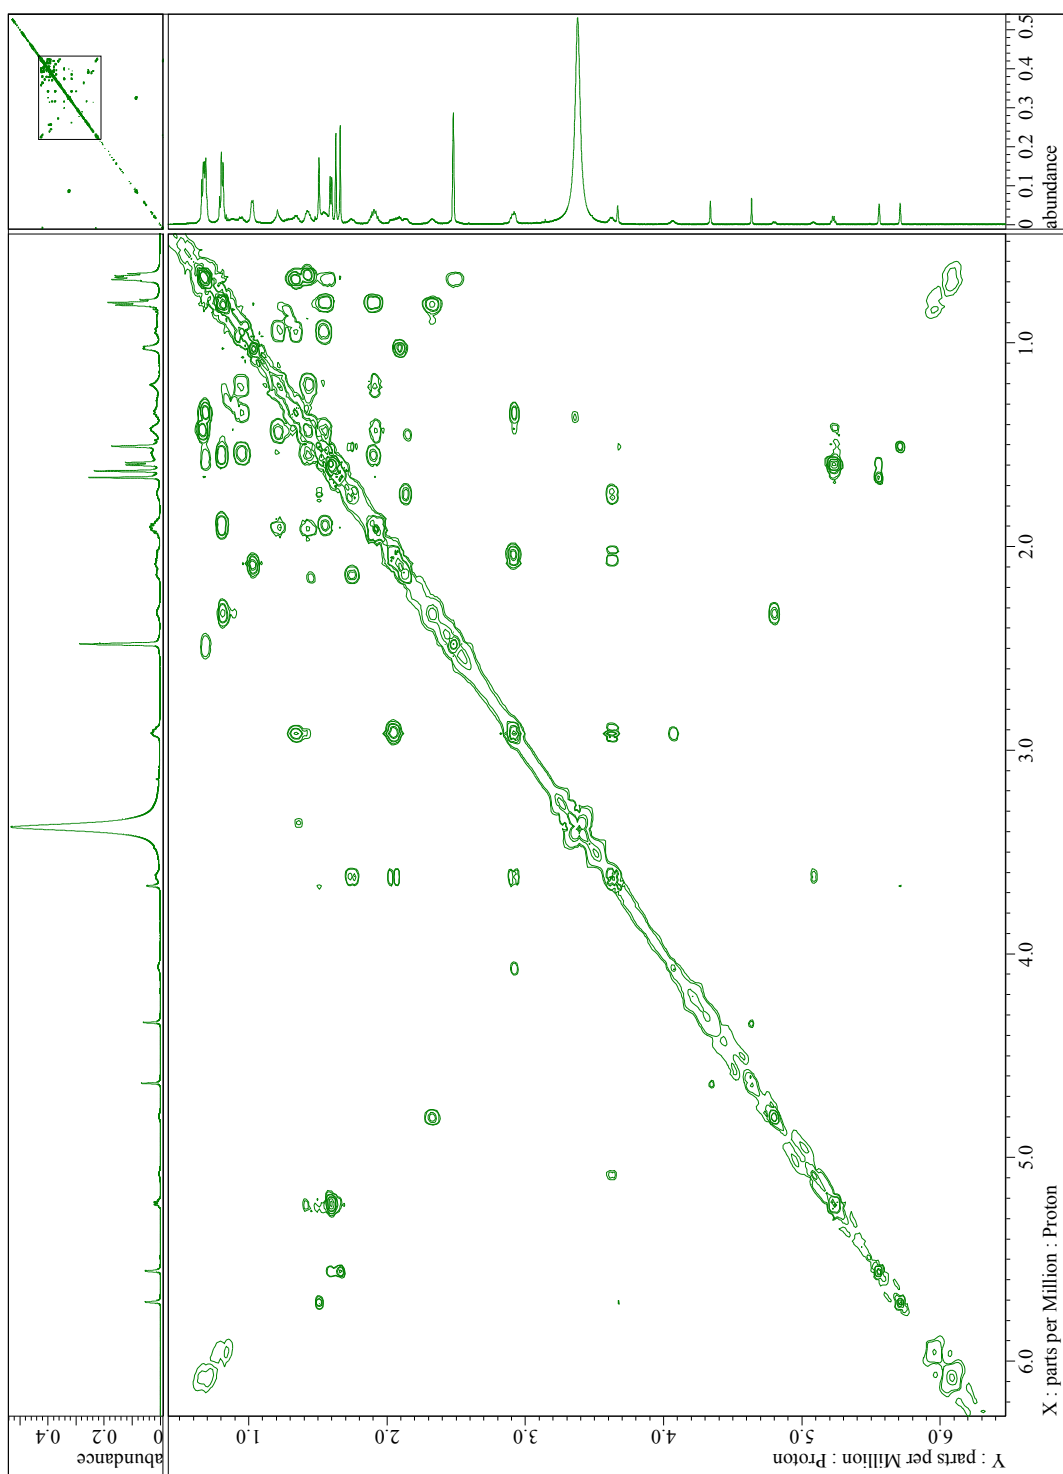

You created this PDF from an application that is not licensed to print to novaPDF printer (<http://www.novapdf.com>)

**Figure S13.** DQF-COSY spectrum for **3**.



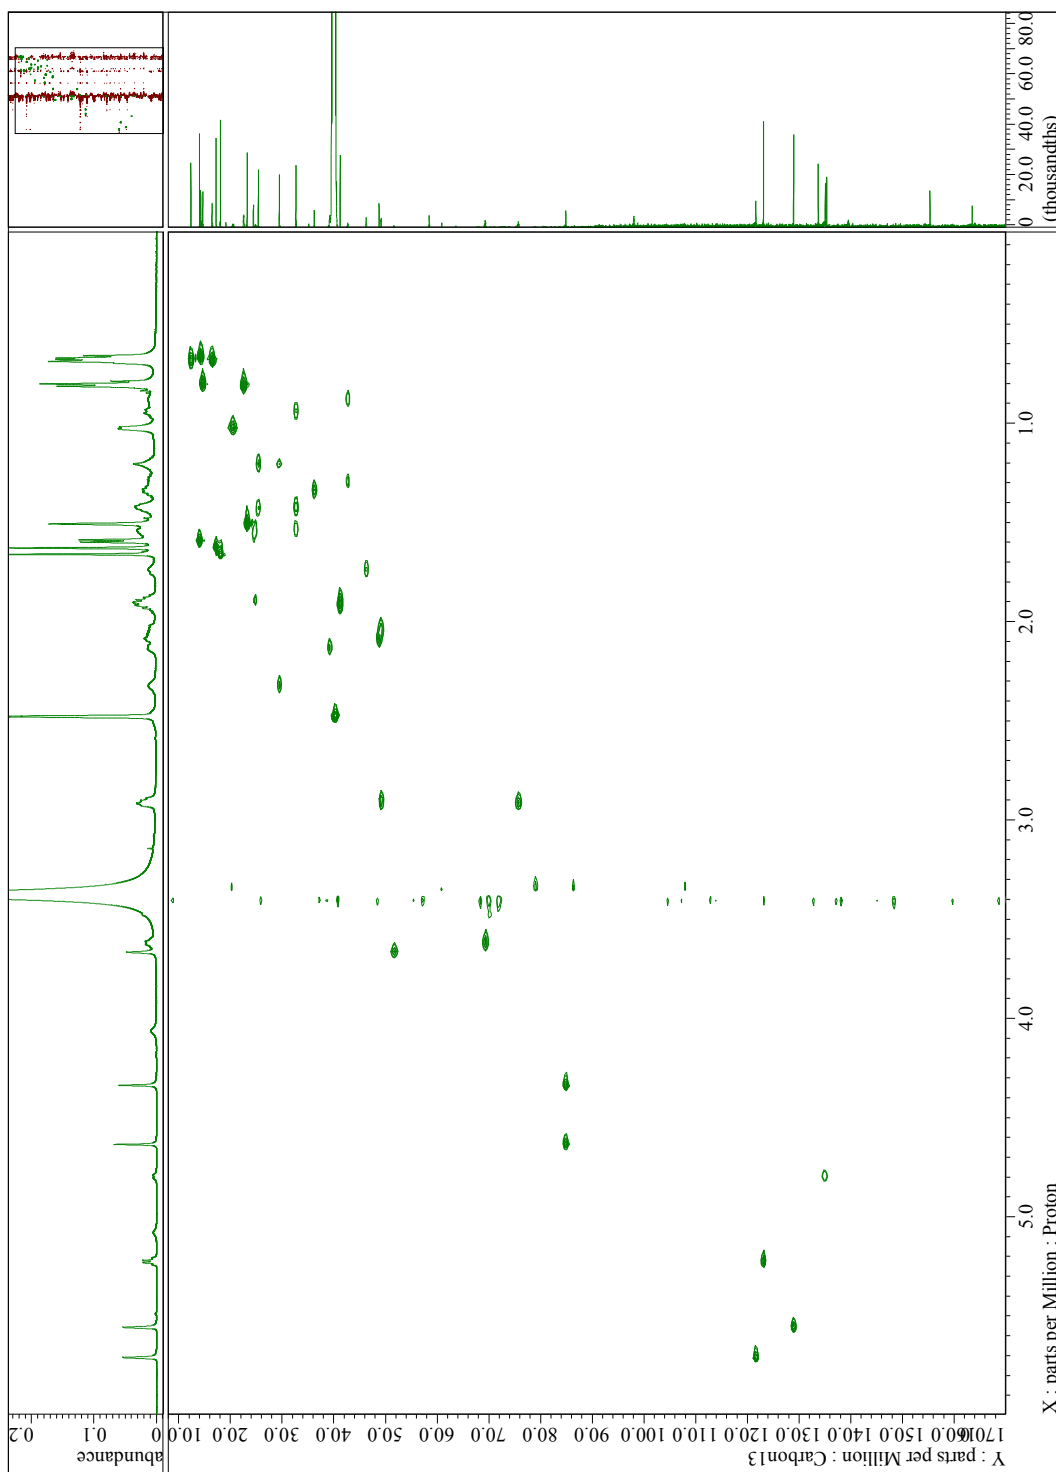

**Figure S14.** HSQC spectrum for **3**.

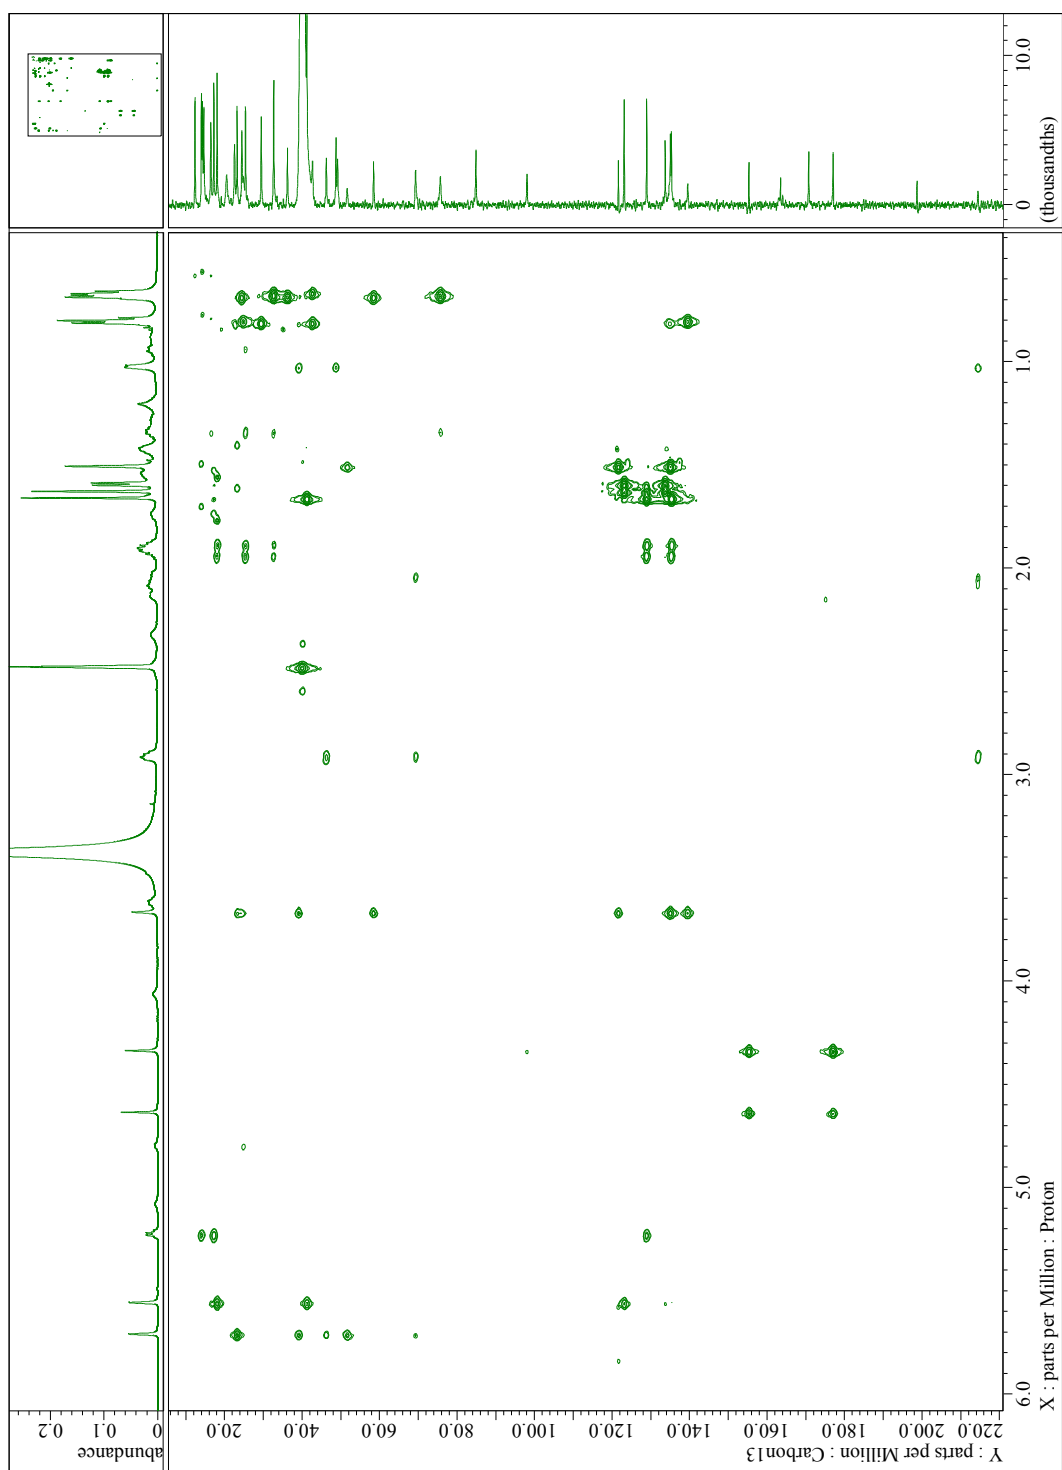

You created this PDF from an application that is not licensed to print to novaPDF printer (<http://www.novapdf.com>)

Figure S15. HMBC spectrum for 3.

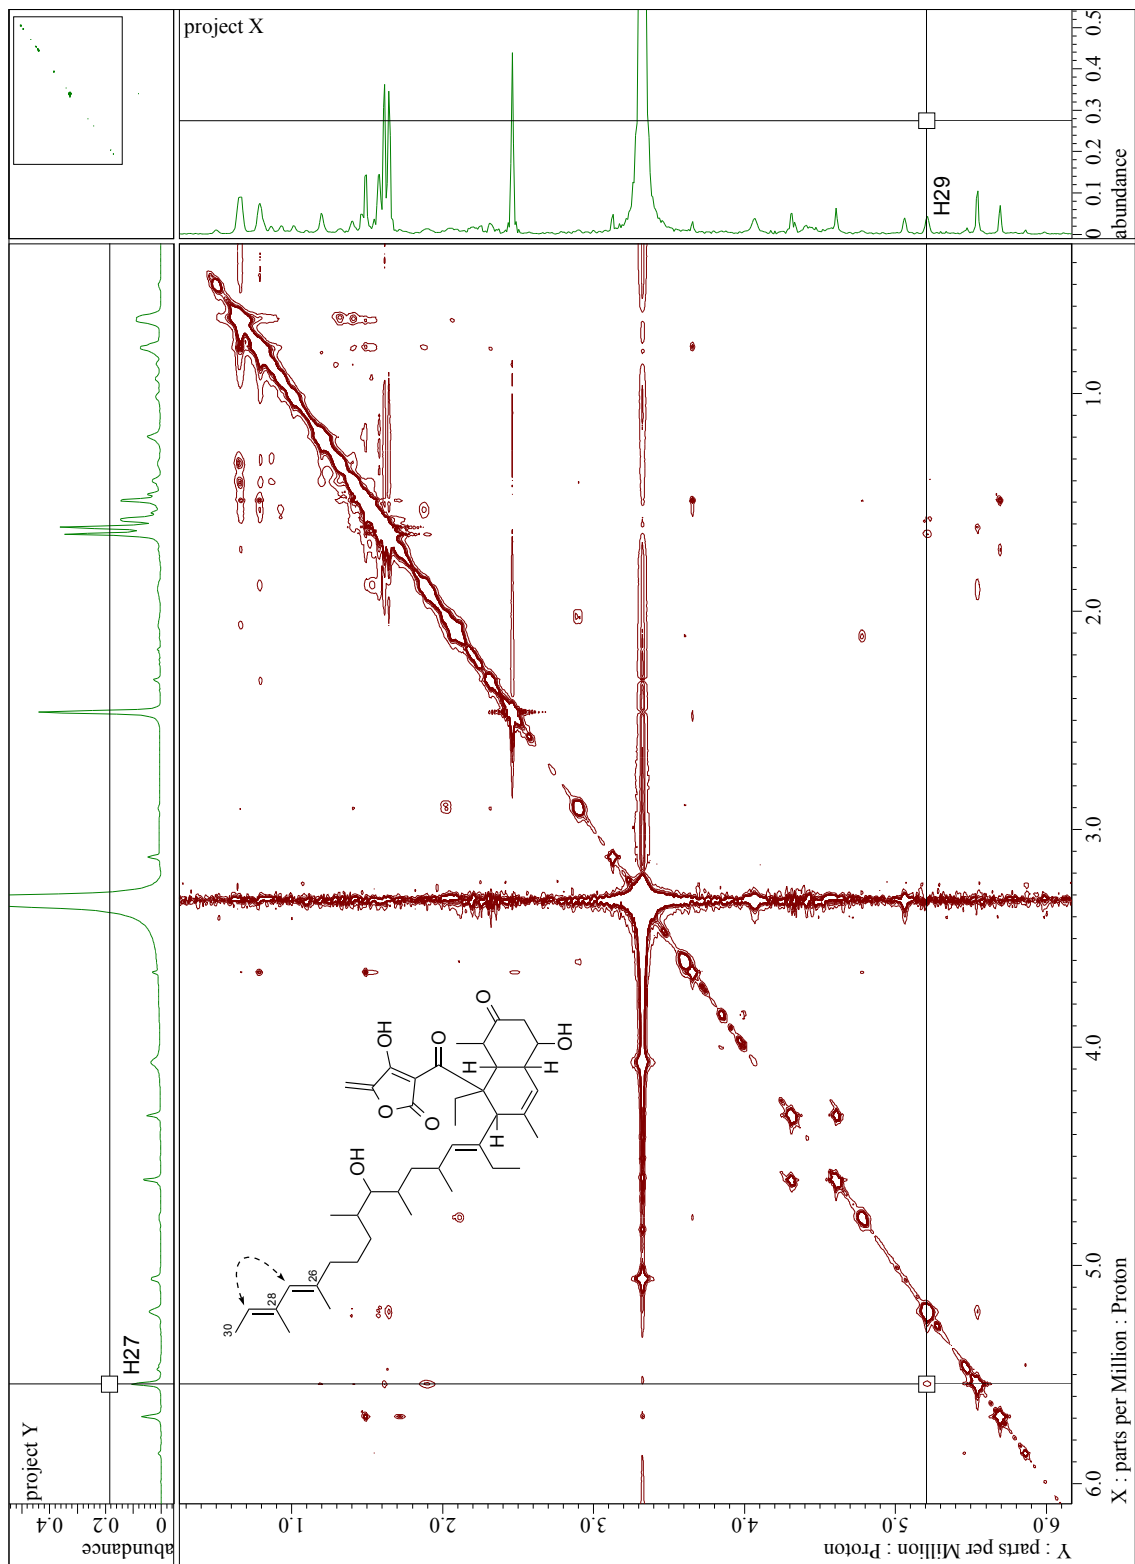

**Figure S16.** NOESY spectrum for **3**.

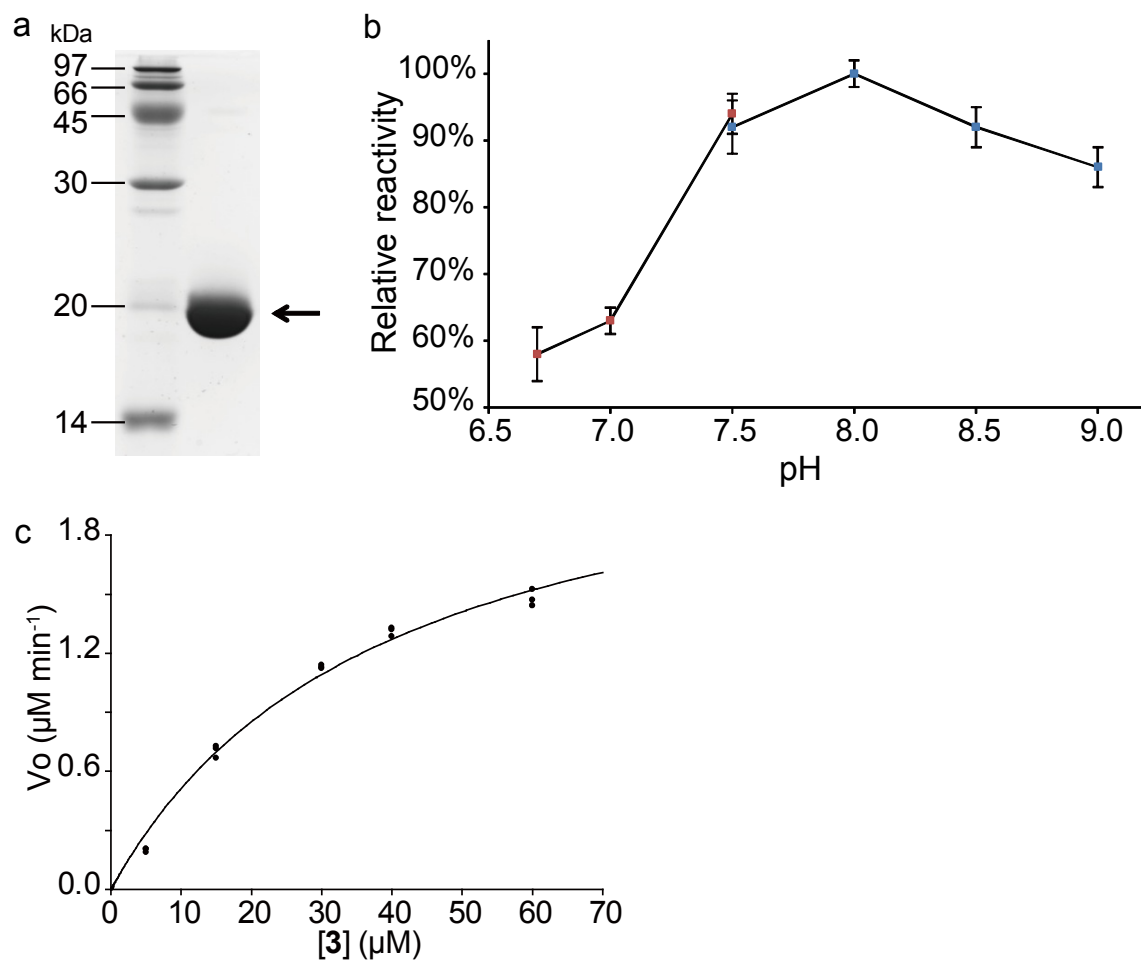

**Figure S17.** Characterization of VstJ.

(A) SDS-PAGE analysis. The estimated molecular weight of His8-VstJ is 17,400 Da. (B) pH dependence of the VstJ reaction. Red and blue dot represent the relative reactivities in 50 mM HEPES-NaOH or Tris-HCl buffer at each pH, respectively. (C) Michaelis-Menten plot for VstJ against **3**.

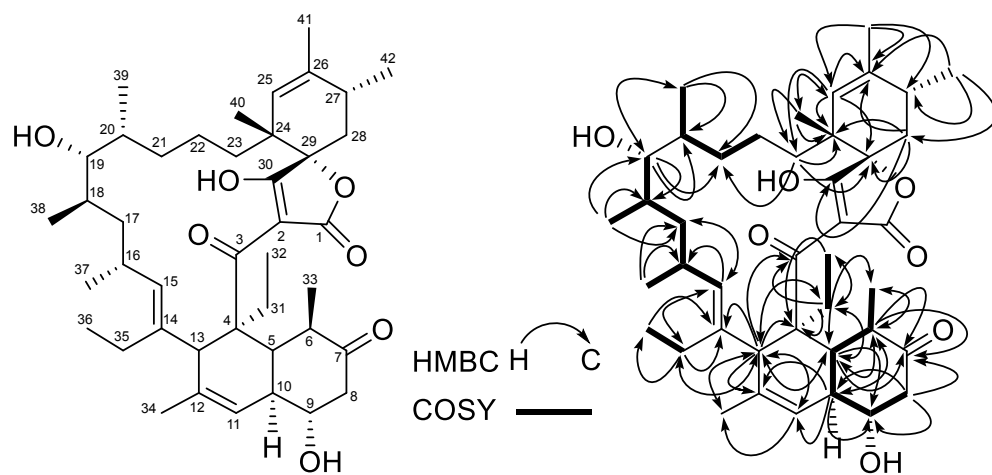

**Figure S18.** Structure of **4** and correlations of HMBC and DQF-COSY of **4**.

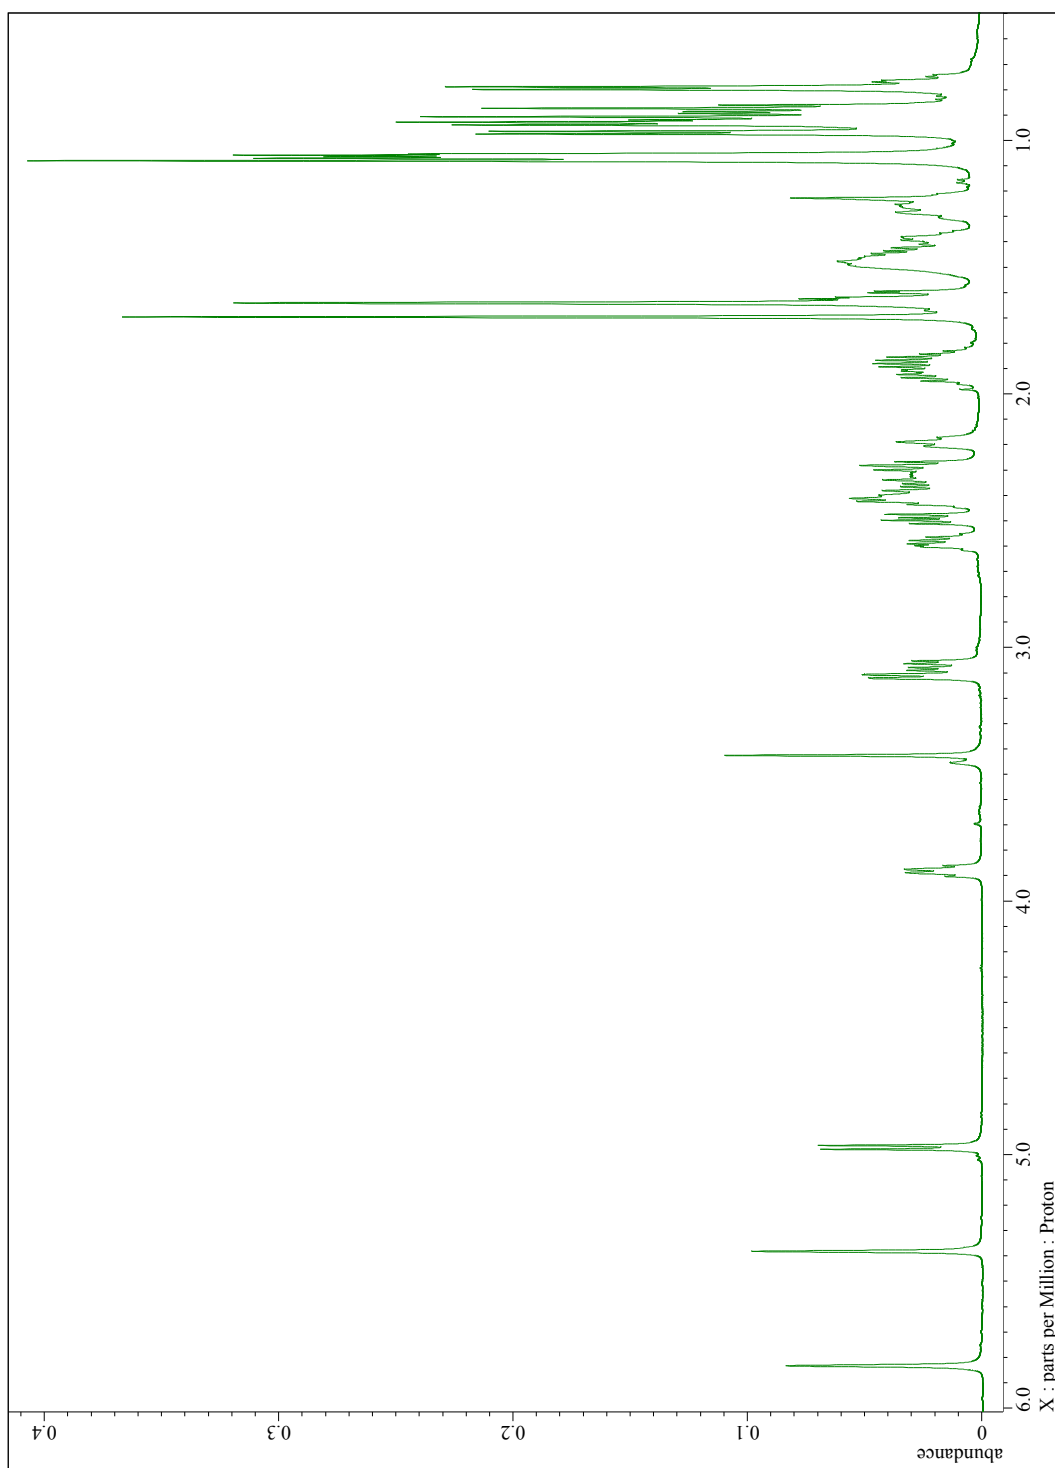

**Figure S19.**  $^1\text{H}$  NMR ( $\text{CDCl}_3$ ) spectrum for **4**.

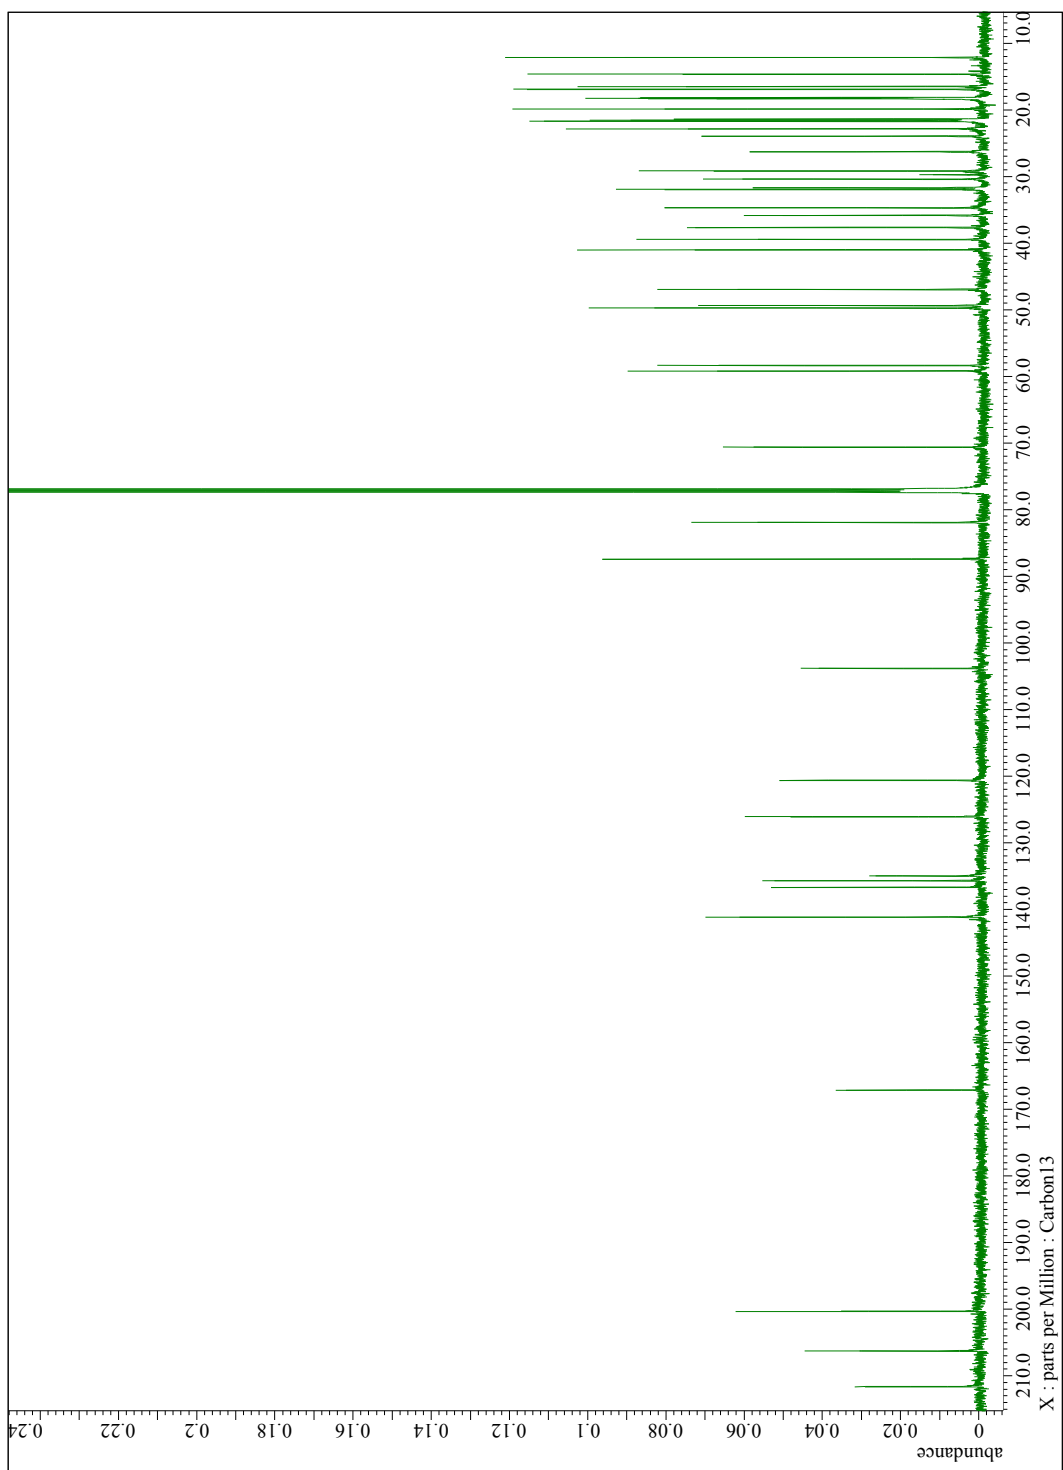

**Figure S20.**  $^{13}\text{C}$  NMR ( $\text{CDCl}_3$ ) spectrum for 4.

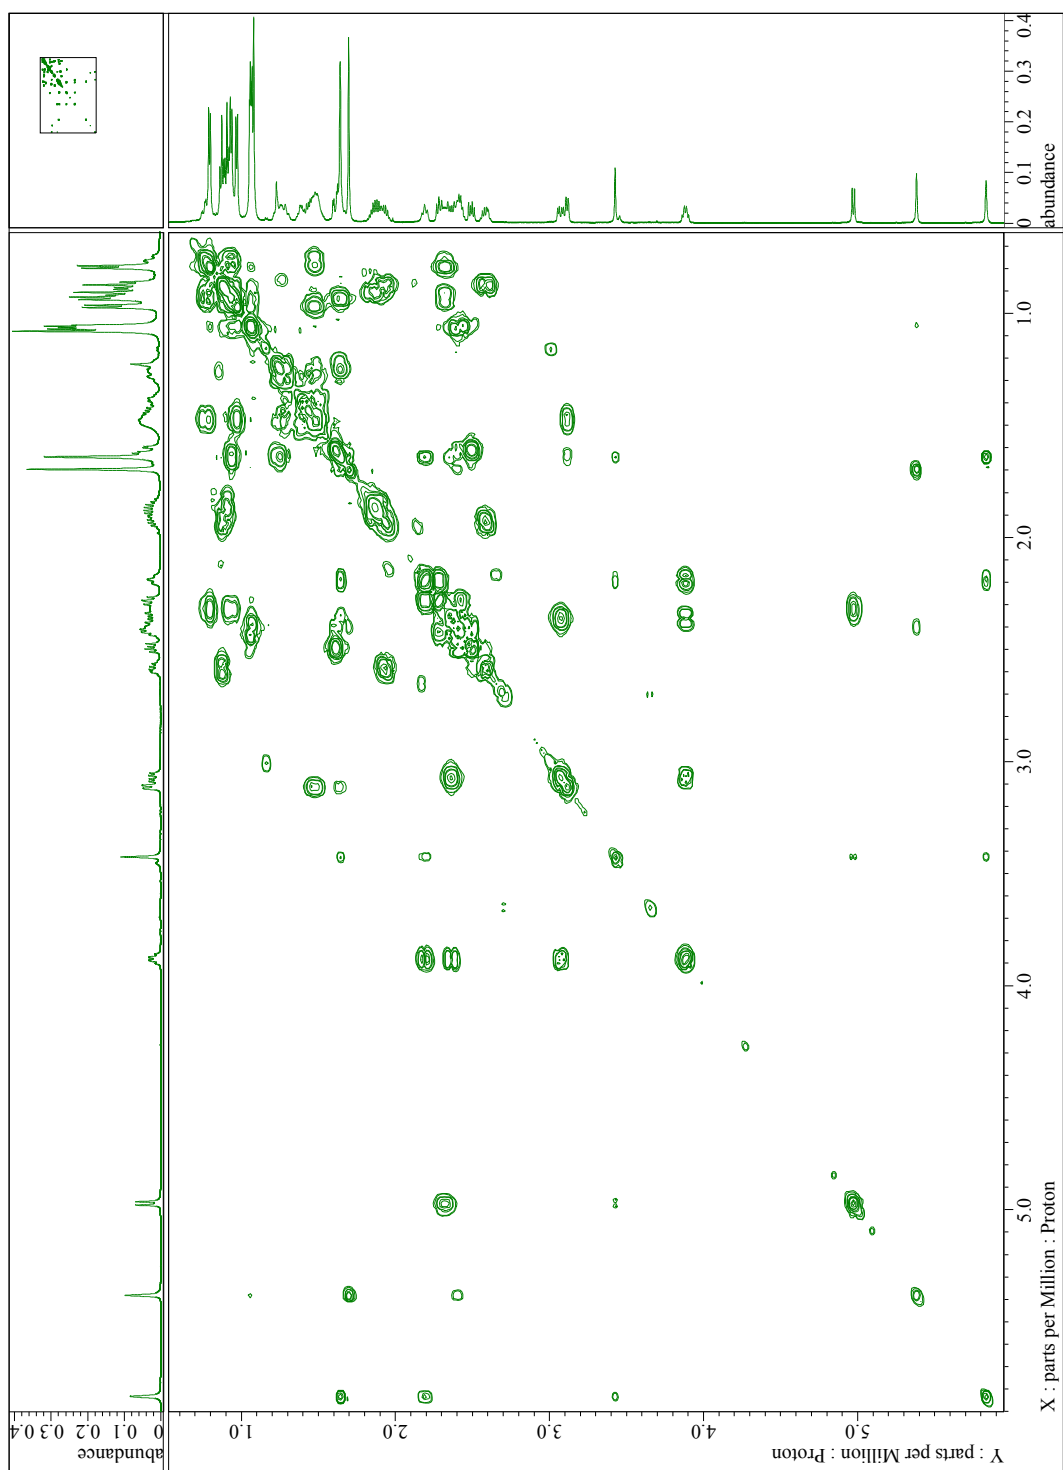

**Figure S21.** DQF-COSY spectrum for **4**.



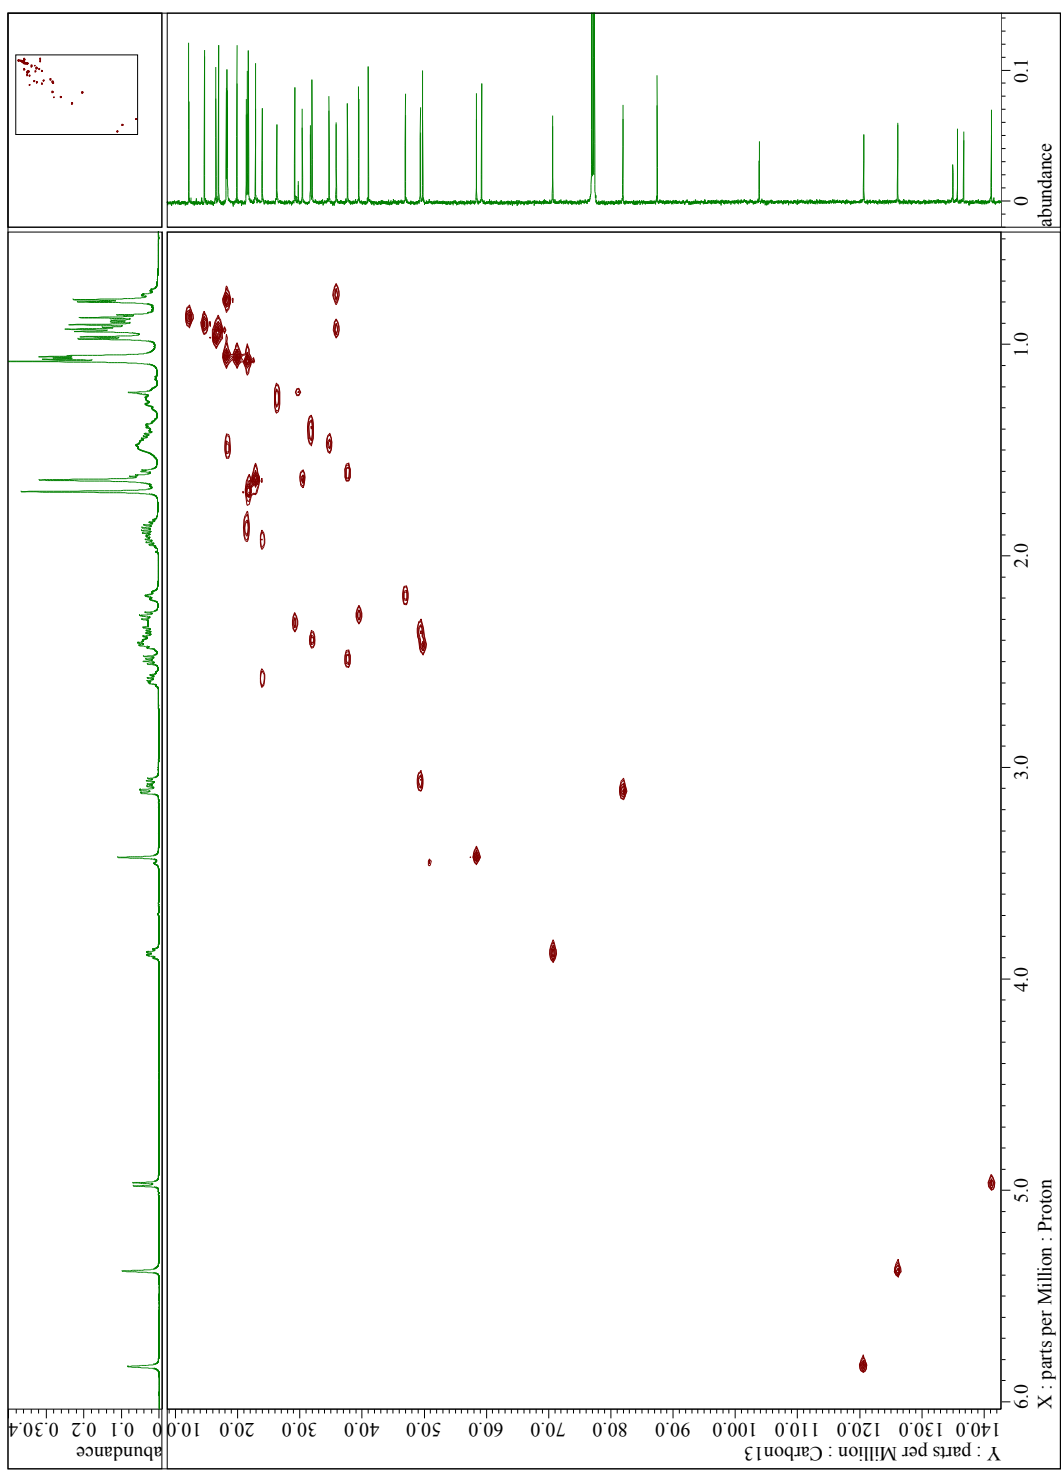

**Figure S22.** HSQC spectrum for 4.

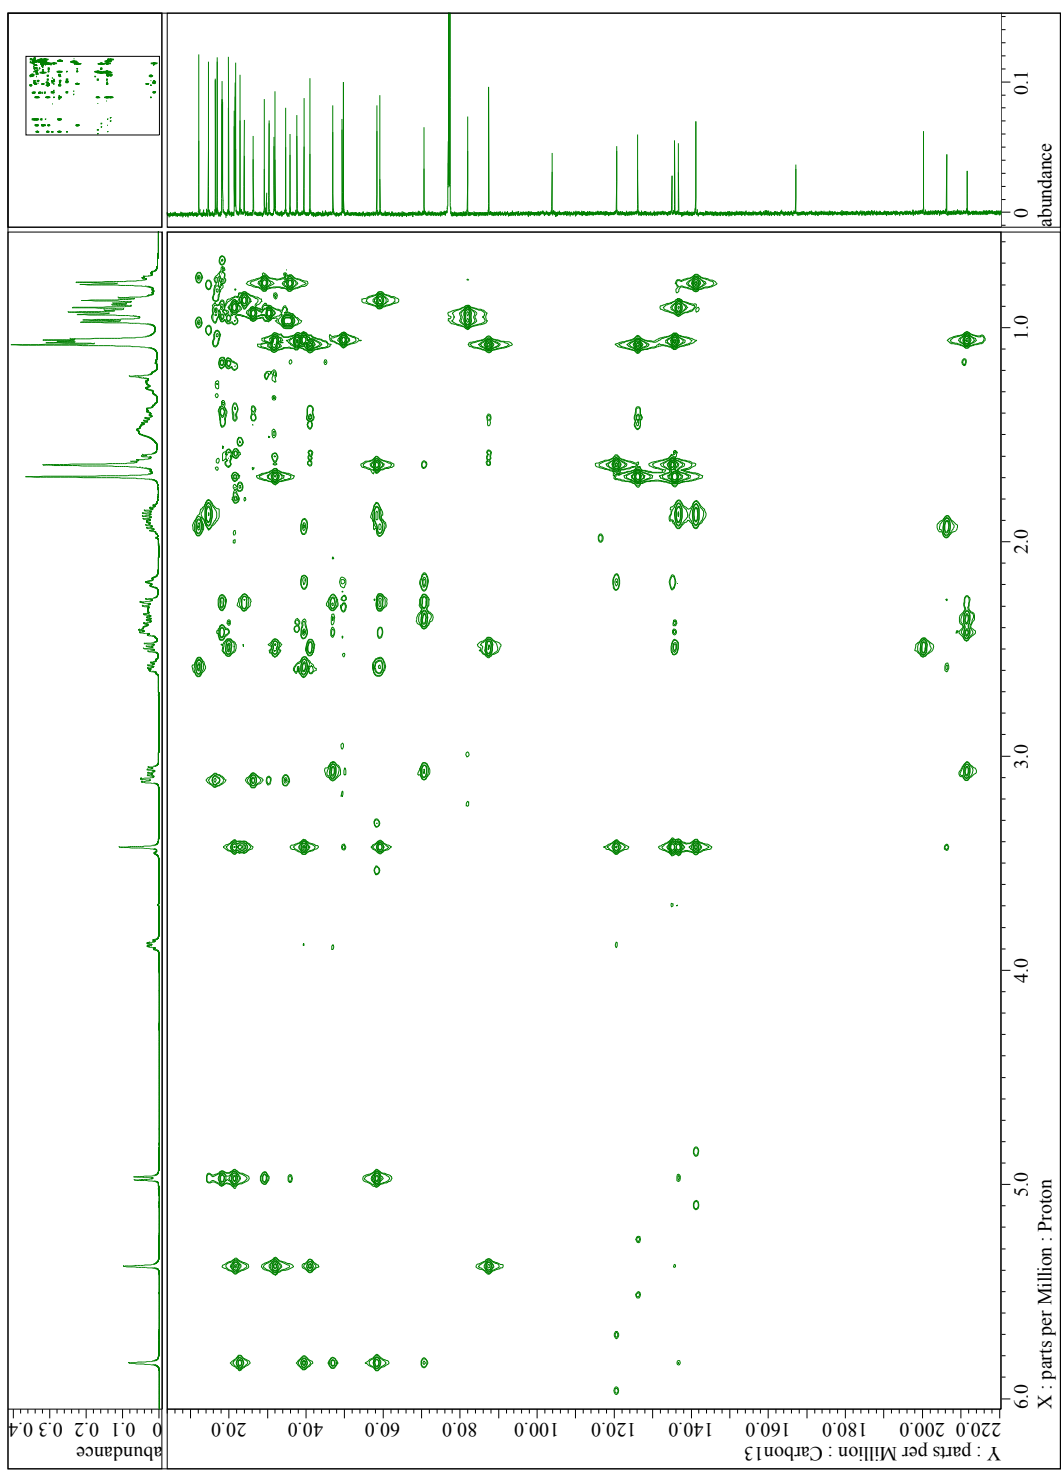

Figure S23. HMBC spectrum for 4.

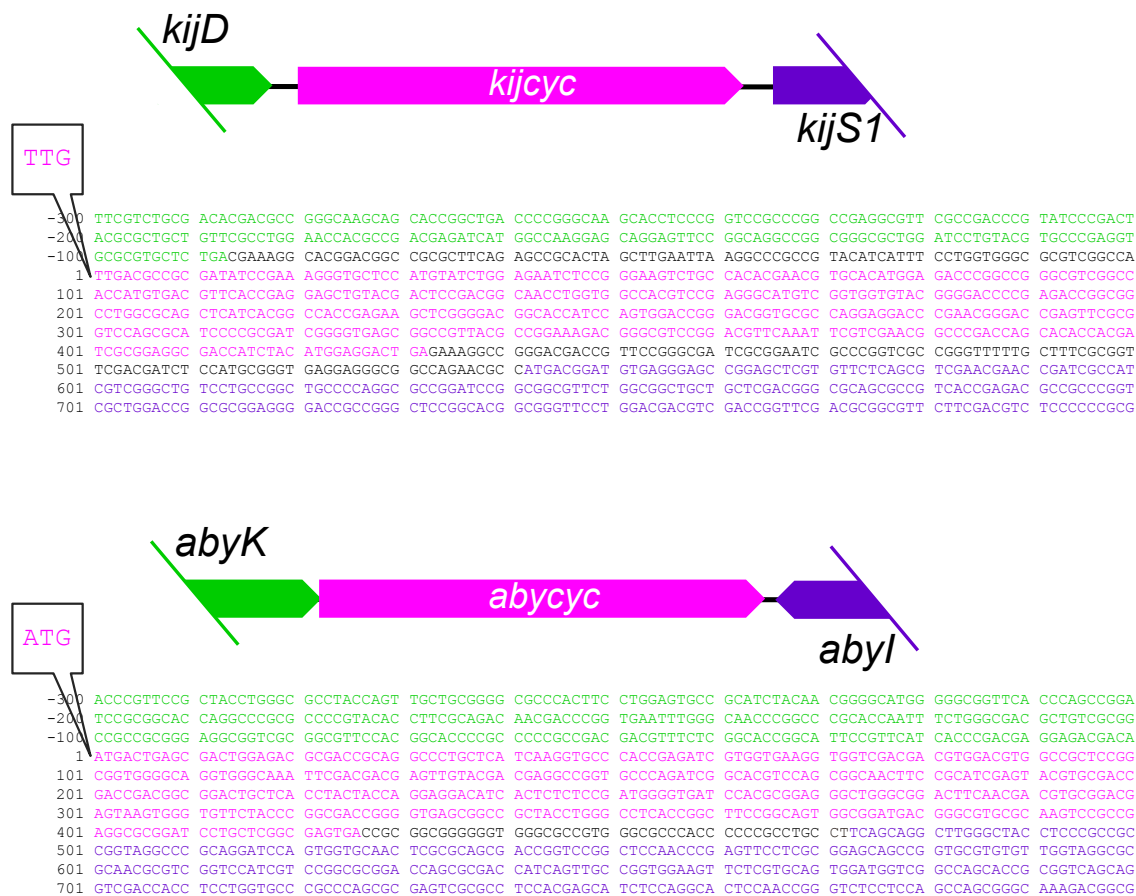

**Figure S24.** Annotation of VstJ homologues, KijCyc and AbyCyc in the biosynthetic gene clusters of kijanimicin and abyssomicin.

Biosynthetic gene clusters of kijanimicin (accession number: EU301739) and abyssomicin (accession number: JF752342) have been reported. VstJ homologues in biosynthetic gene clusters of Kijanimicin and Abyssomicin are not annotated as genes. Here, we name each of additional genes *kijCyc* and *abyCyc*, respectively.

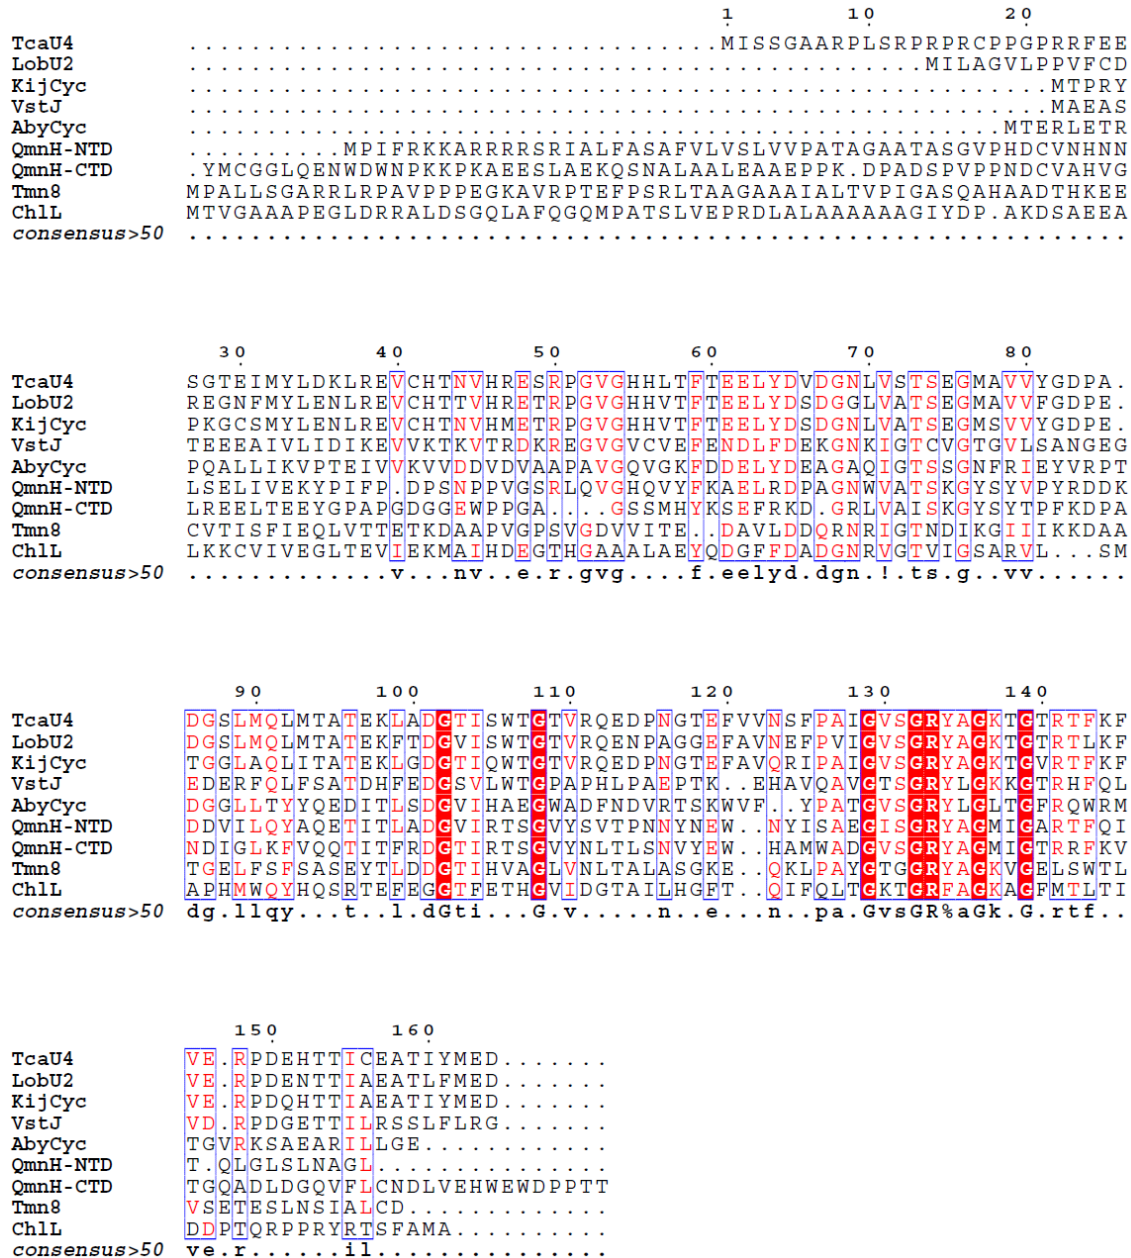

**Figure S25.** Multiple alignment of VstJ and its homologues.

The amino acid sequences of AbyCyc and KijCyc are deduced as shown in Fig. S18. QmnH-NTD and QmnH-CTD show N-terminal (1 aa to 178 aa) and C-terminal (179 aa to 376 aa) domains of QmnH (accession number: AF157012). VstJ and its homologues show weak homology. However, some amino acid residues are highly conserved among the VstJ homologues.

## Reference

1. Komatsu, M.; Komatsu, K.; Koivai, H.; Yarnada, Y.; Kozone, I.; Izumikawa, M.; Hashimoto, J.; Takagi, M.; Omura, S.; Shin-ya, K.; Cane, D. E.; Ikeda, H. *ACS Synth. Biol.* **2013**, *2*, 384.
2. Komatsu, M.; Uchiyama, T.; Omura, S.; Cane, D. E.; Ikeda, H. *Proc. Nat. Acad. Sci. USA.* **2010**, *107*, 2646.
3. Hamano, Y.; Maruyama, C.; Kimoto, H. *Actinomycetologica* **2006**, *20*, 35.
4. Jez, J. M.; Ferrer, J. L.; Bowman, M. E.; Dixon, R. A.; Noel, J. P. *Biochemistry* **2000**, *39*(5), 890.
5. Chijiwa, S.; Park, H. R.; Furihata, K.; Ogata, M.; Endo, T.; Kuzuyama, T.; Hayakawa, Y.; Shin-ya, K. *Tetrahedron Lett.* **2003**, *44*, 5897.
6. [https://www.broadinstitute.org/annotation/genome/streptomyces\\_group/MultiHome.html](https://www.broadinstitute.org/annotation/genome/streptomyces_group/MultiHome.html)
7. Reeves, C. D.; Murli, S.; Ashley, G. W.; Piagentini, M.; Hutchinson, C. R.; McDaniel, R. *Biochemistry* **2001**, *40*, 15464.
8. Keatinge-Clay, A. T. *Chem. Biol.* **2007**, *14*, 898.
9. Kwan, D. H.; Sun, Y.; Schulz, F.; Hong, H.; Popovic, B.; Sim-Stark, J. C. C.; Haydock, S. F.; Leadlay, P. F. *Chem. Biol.* **2008**, *15*, 1231.
10. Demydchuk, Y.; Sun, Y.; Hong, H.; Staunton, J.; Spencer, J. B.; Leadlay, P. F., *Chembiochem* **2008**, *9* (7), 1136.
